# 1 Tissue Fluidity Promotes Epithelial Wound Healing

2

3 Robert J. Tetley<sup>1</sup>, Michael F. Staddon<sup>2,3</sup>, Shiladitya Banerjee<sup>2,3</sup>, Yanlan Mao<sup>1,3,4\*</sup>

4

5 (1) MRC Laboratory for Molecular Cell Biology, University College London, Gower  
6 Street, London WC1E 6BT, United Kingdom

7 (2) Department of Physics & Astronomy, University College London, London, United  
8 Kingdom

9 (3) Institute for the Physics of Living Systems, University College London, London,  
10 United Kingdom

11 (4) College of Information and Control, Nanjing University of Information Science and  
12 Technology, Nanjing, Jiangsu 210044, China

13

14 \* Correspondence: [y.mao@ucl.ac.uk](mailto:y.mao@ucl.ac.uk)

15

## 16 Summary

17 Epithelial tissues are inevitably damaged from time to time and must therefore  
18 have robust repair mechanisms. The behaviour of tissues depends on their  
19 mechanical properties and those of the surrounding environment<sup>1</sup>. However, it  
20 remains poorly understood how tissue mechanics regulates wound healing,  
21 particularly in *in vivo* animal tissues. Here we show that by tuning epithelial cell  
22 junctional tension, we can alter the rate of wound healing. We observe cells moving

1 past each other at the wound edge by intercalating, like molecules in a fluid, resulting  
2 in seamless wound closure. Using a computational model, we counterintuitively  
3 predict that an increase in tissue fluidity, via a reduction in junctional tension, can  
4 accelerate the rate of wound healing. This is contrary to previous evidence that  
5 actomyosin tensile structures are important for wound closure<sup>2-6</sup>. When we  
6 experimentally reduce tissue tension, cells intercalate faster and wounds close in  
7 less time. The role we describe for tissue fluidity in wound healing, in addition to its  
8 known roles in developing<sup>7,8</sup> and mature tissues<sup>9</sup>, reinforces the importance of the  
9 fluid state of a tissue.

10

## 11 **Main Text**

12 To investigate the role of tissue mechanics in wound healing, we studied  
13 tissue repair in the epithelium of *ex vivo Drosophila* wing imaginal discs by live time-  
14 lapse imaging. After wounding wing discs by laser ablation, an actomyosin purse  
15 string assembles at the wound's leading edge (Fig. 1a, Supplementary Video 1), as  
16 in other systems<sup>5,10-13</sup>. To understand the repair process in more detail, we  
17 quantitatively analysed<sup>14</sup> wound morphology over the time course of wound closure.  
18 We observe three distinct phases after wounding: recoil, fast closure and slow  
19 closure (Fig. 1b, Supplementary Video 2). Immediately after wounding, the wound  
20 area increases, due to a release of tissue tension by the ablation. The wound area  
21 then reduces in time, with an initial fast phase. However, after reaching  
22 approximately 50% of the original wound area, the rate of wound closure decreases  
23 dramatically, until closure.

1           We hypothesised that myosin II (MyoII) dynamics in the purse string might  
2 regulate changes in wound closure rate and quantified the intensity of MyoII in the  
3 purse string during the closure process (Fig. 1c). MyoII intensity increases after  
4 wounding, before peaking at roughly twice the initial intensity. This peak coincides  
5 with the transition between fast and slow closure phases. The saturation of MyoII  
6 before complete wound closure suggested that other cell behaviours might be  
7 required to generate forces to complete wound closure. By closely examining cell  
8 behaviours around the wound, we observe that cells at the wound edge readily  
9 undergo intercalation (Fig. 1d, e, Supplementary Video 2). This cell behaviour differs  
10 to those associated with wound healing in other *Drosophila* tissues, such as cell  
11 fusion<sup>15,16</sup>, polyploidisation<sup>16</sup> and cell intercalation further from the wound edge<sup>17</sup>.  
12 During wound edge intercalations, junctions in contact with the wound shrink to a  
13 single vertex and new junctions grow in the orthogonal direction (Fig. 1d). As a  
14 result, the number of cells in contact with the wound decreases over time (Fig. 1e,  
15 Supplementary Fig. 1a-d). The rate at which wound edge cells intercalate is roughly  
16 double that of an unwounded tissue (Fig. 1g), while the majority of intercalation  
17 events occur during the slow phase of wound closure (Fig. 1f), indicating that wound  
18 edge cell intercalation might be required to promote the completion of wound  
19 closure.

20           To quantitatively test the role of wound edge cell intercalation, we developed  
21 a computational vertex model<sup>18</sup> for wound closure (Supplementary Fig. 2, see  
22 methods). We parameterised the model so that edges contacting the wound  
23 gradually increase in tension compared to the surrounding tissue, to mimic the  
24 assembly of the contractile actomyosin purse string. To capture experimentally  
25 observed fluctuations in junctional MyoII<sup>7</sup>, we introduced fluctuations in line tension.

1 Without introducing intercalation events into the model, simulated wounds are unable  
2 to close (Figs. 1h, j, Supplementary Video 3). By contrast, when intercalation is  
3 enabled in the model (see methods), wounds are able to close (Figs. 1i, k,  
4 Supplementary Video 4), supporting the hypothesis that intercalation at the wound  
5 edge is necessary for wing disc wound closure.

6 The vertex model predicts that in the absence of intercalation, cells around  
7 the wound become increasingly elongated towards the centre of the wound (Fig. 2a),  
8 unlike in simulations with intercalations enabled (Fig. 2b). This led us to hypothesise  
9 that wound edge intercalation has a crucial role in maintaining cell shape and tissue  
10 patterning. Indeed, wing disc cells appear regularly packed immediately after wound  
11 closure (Fig. 2c) and the polygon distribution of wound edge cells is restored upon  
12 healing (Fig. 2d). To test our vertex model's prediction that intercalation preserves  
13 cell shape, we quantified cell elongation in the first three rows of cells away from the  
14 wound in wing discs (Fig. 2e, Supplementary Video 5). Whereas cells in the second  
15 and third rows undergo little change in elongation during wound closure (Fig. 2f),  
16 cells in the first row behave differently and undergo a transient increase in  
17 elongation, before returning to their original shapes prior to wound closure (Figs. 2f-  
18 h). Cells return to their original shape during the slow phase of closure (Fig. 2f),  
19 when the majority of intercalations occur, supporting the role of intercalation in  
20 preserving cell shape.

21 These findings suggested that intercalation events help maintain cell shape  
22 and that wound healing in an epithelium that does not intercalate will lead to cell  
23 deformation. To test this idea further, we compared wound edge intercalation in the  
24 wing disc to the *Drosophila* embryonic ectoderm, an epithelium in which cells do not  
25 return to their original shape (Fig. 2i). Following wound closure in the *Drosophila*

1 embryonic ectoderm, cells can be up to twice as elongated as they were prior to  
2 wounding<sup>17</sup>. Supporting the model's predictions, there are significantly fewer wound  
3 edge intercalations in embryos prior to wound closure (Fig. 2j).

4         These results suggested that wound closure is controlled by two dynamic  
5 properties of the wounded tissue: the rate of wound edge intercalation and the  
6 tension in the purse string. In support of this view, simulations using our vertex  
7 model demonstrate that rates of cell division (Supplementary Fig. 3e, f) and  
8 magnitudes of edge tension fluctuations (Supplementary Fig. 3c, d) have little effect  
9 on wound closure rate. We therefore used the model to test the relative roles of  
10 intercalation rate and purse string tension in wounded tissues. We found that the rate  
11 of intercalation in the tissue can be quantitatively tuned by modulating the line  
12 tension term, which represents cell-cell interfacial tension in our model<sup>7</sup> (Fig. 3a).  
13 Intercalation rate can also be tuned by modulating the perimeter contractility  
14 (Supplementary Fig. 3a, b), however, as there is redundancy in the 2 terms in  
15 representing MyoII contraction, we chose to only vary the line tension term in  
16 subsequent simulations. As cell line tension decreases, the rate of intercalation in  
17 the tissue increases, which we term an increase in "tissue fluidity" – the  
18 rearrangement of cells relative to each other being analogous to molecules in a  
19 liquid. Increasing either purse string tension or tissue fluidity (by decreasing line  
20 tension) reduces the time taken for wounds to close (Fig. 3b). Although reducing line  
21 tension throughout the system increases bulk tissue fluidity (Fig. 3c), the effect is  
22 more enhanced at the wound edge (Fig. 3d). Unexpectedly, we find a region of  
23 parameter space where a reduction in purse string tension is more than  
24 compensated for by an increase in tissue fluidity, leading to accelerated wound  
25 closure (Figs. 3b, e-f, magenta). This suggests that tissue fluidity can act as a

1 predominant driver of wound closure and that the purse string may only be providing  
2 a directional cue at late closure stages, despite providing the initial driving force.

3 To test these predictions from our vertex model further, we sought to  
4 experimentally perturb cell edge tension. In epithelial tissues, cell edge tension is  
5 governed by the activity of non-muscle MyoII (Fig. 4a). To test the roles of purse  
6 string tension and tissue fluidity in the wing disc, we genetically modulated the  
7 activity of MyoII in the wing pouch epithelium. To increase tension, we performed  
8 RNAi against the *Myosin binding subunit (Mbs)* of the Myosin Phosphatase, a  
9 phosphatase that inactivates MyoII by dephosphorylating its regulatory light chain<sup>19</sup>  
10 (Spaghetti squash (Sqh) in *Drosophila*). To decrease tension, we performed RNAi  
11 against *Rho-kinase (Rok)*, a kinase that activates MyoII by phosphorylating Sqh<sup>20,21</sup>.  
12 We confirmed the effect of these genetic perturbations on tension by quantifying  
13 vertex recoil rates (a greater recoil rate implying higher tension) after single junction  
14 ablations (Supplementary Fig. 5). We then wounded these wing discs  
15 (Supplementary Fig. 4a-d) and compared the dynamics of wound closure to wildtype  
16 (WT) wing discs. In *Mbs* RNAi wing discs, where tension is high, wounds fail to close  
17 within the imaging time window (Figs. 4b, c, Supplementary Fig. 4a, Supplementary  
18 Fig. 6, Supplementary Video 6). Furthermore, wound edge cell intercalation is almost  
19 entirely abolished (Figs. 4c, e-f, Supplementary Fig. 6, Supplementary Video 6),  
20 supporting the importance of intercalation in promoting wound closure.

21 In *Rok* RNAi wing discs (Supplementary Fig. 7, Supplementary Video 7), in  
22 which tension is reduced, wounds close faster than in WT wing discs. While these  
23 wounds initially close more slowly than WT wounds, they eventually overtake them  
24 and unexpectedly close in roughly half the time of WT wounds (Figs. 4b, d,  
25 Supplementary Fig. 4a). This is accompanied by an increase in the rate of wound

1 edge intercalation (Figs. 4d-f). One consequence of decreasing MyoII activity  
2 through *Rok* RNAi, is that it is likely to increase tissue fluidity, while simultaneously  
3 decreasing purse string tension<sup>3,22</sup>. The observation that the *Rok* RNAi wounds close  
4 faster despite a weakened purse string is in agreement with the regions of parameter  
5 space in our vertex modelling, where a weakened purse string can be overcome by  
6 an increase in tissue fluidity (Figs. 3b, e-f, magenta).

7         We have demonstrated that wing disc wound closure is dependent on cell-cell  
8 intercalation-driven tissue fluidity. Intercalation a few rows of cells away from the  
9 wound is also known to be important for wound closure in the *Drosophila* embryonic  
10 ectoderm<sup>17</sup>. However, the embryonic intercalations resemble those characteristic of  
11 *Drosophila* germband extension<sup>23</sup>, relying on active polarised flows of actomyosin<sup>17</sup>,  
12 while in the wing disc MyoII activity is inhibitory to intercalation and fluidity. Polarised  
13 actomyosin activity may be a hallmark of healing in more naïve embryonic tissues  
14 and global junctional tension-based fluidity may dominate in more mature tissues.  
15 Observations in human bronchial epithelial cell (HBEC) layers support this  
16 hypothesis. HBEC layers demonstrate a progressive loss of fluidity after becoming  
17 confluent<sup>9</sup>, likely sharing parallels with wound healing, as in both situations the  
18 epithelium must explore multiple cellular conformations before reaching a new  
19 homeostatic state.

20         Changes in tension-based fluidity, such as those we have induced by MyoII  
21 perturbation, can be considered as jamming/unjamming transitions<sup>24,25</sup>. Cell layers  
22 can transition between behaving like a fluid (unjammed) with many rearrangements  
23 and a solid (jammed), lacking the ability to rearrange<sup>24,25</sup>. Modelling has described  
24 how jamming/unjamming transitions can occur due to changes in junctional tension  
25 and cell-cell adhesion<sup>9</sup>. These two properties combine to control the magnitude of a

1 mechanical energy barrier, which must be overcome for cells to rearrange relative to  
2 each other<sup>9,24</sup>, allowing an epithelium to behave as a fluid. By reducing tension in the  
3 wing disc, we are likely lowering this energy barrier, allowing cells to rearrange more.  
4 Simulations demonstrate that, with intercalations, tissues can transit to a lower  
5 energy state, which may allow further intercalations to occur (Supplementary Fig. 8a-  
6 c).

7         The dynamics of wound closure in wing discs can be explained purely through  
8 junctional dynamics in our vertex model, rather than previously described cell-  
9 crawling based migration<sup>26-29</sup>. Closing a wound by junctional dynamics alone may be  
10 a mechanism through which epithelial integrity and function can be maintained.  
11 Furthermore, our vertex model simulations suggest that wounds can close simply by  
12 introducing a purse string, without the need to actively change any chemical or  
13 mechanical properties of the surrounding tissue, provided its original state is  
14 permissive to intercalations. The increased fluidity we observe at the wound edge in  
15 wing discs is therefore an emergent property defined by the pre-existing junctional  
16 tension of the tissue in response to an actomyosin purse string. Changing tension of  
17 a wounded tissue, as we have done in the wing disc, therefore presents an attractive  
18 therapeutic target that could be used to accelerate wound healing in the future.

19

## 20 **References**

- 21 1         Ladoux, B. & Mege, R. M. Mechanobiology of collective cell behaviours. *Nat Rev Mol Cell Bio*  
22         **18**, 743-757, doi:10.1038/nrm.2017.98 (2017).
- 23 2         Vedula, S. R. K. *et al.* Mechanics of epithelial closure over non-adherent environments. *Nat*  
24         *Commun* **6**, doi:ARTN 6111



- 1 10.1038/ncomms7111 (2015).
- 2 3 Russo, J. M. *et al.* Distinct temporal-spatial roles for rho kinase and myosin light chain kinase  
3 in epithelial purse-string wound closure. *Gastroenterology* **128**, 987-1001,  
4 doi:10.1053/j.gastro.2005.01.004 (2005).
- 5 4 Abreu-Blanco, M. T., Verboon, J. M., Liu, R., Watts, J. J. & Parkhurst, S. M. *Drosophila*  
6 embryos close epithelial wounds using a combination of cellular protrusions and an  
7 actomyosin purse string. *J Cell Sci* **125**, 5984-5997, doi:10.1242/jcs.109066 (2012).
- 8 5 Wood, W. *et al.* Wound healing recapitulates morphogenesis in *Drosophila* embryos. *Nature*  
9 *Cell Biology* **4**, 907-912, doi:10.1038/ncb875 (2002).
- 10 6 Brock, J., Midwinter, K., Lewis, J. & Martin, P. Healing of incisional wounds in the embryonic  
11 chick wing bud: Characterization of the actin purse-string and demonstration of a  
12 requirement for Rho activation. *Journal of Cell Biology* **135**, 1097-1107, doi:DOI  
13 10.1083/jcb.135.4.1097 (1996).
- 14 7 Curran, S. *et al.* Myosin II Controls Junction Fluctuations to Guide Epithelial Tissue Ordering.  
15 *Dev Cell* **43**, 480-492 e486, doi:10.1016/j.devcel.2017.09.018 (2017).
- 16 8 Miroshnikova, Y. A. *et al.* Adhesion forces and cortical tension couple cell proliferation and  
17 differentiation to drive epidermal stratification. *Nat Cell Biol* **20**, 69-80, doi:10.1038/s41556-  
18 017-0005-z (2018).
- 19 9 Park, J. A. *et al.* Unjamming and cell shape in the asthmatic airway epithelium. *Nat Mater* **14**,  
20 1040-1048, doi:10.1038/nmat4357 (2015).
- 21 10 Bement, W. M., Forscher, P. & Mooseker, M. S. A Novel Cytoskeletal Structure Involved in  
22 Purse String Wound Closure and Cell Polarity Maintenance. *Journal of Cell Biology* **121**, 565-  
23 578, doi:DOI 10.1083/jcb.121.3.565 (1993).
- 24 11 Martin, P. & Lewis, J. Actin Cables and Epidermal Movement in Embryonic Wound-Healing.  
25 *Nature* **360**, 179-183, doi:DOI 10.1038/360179a0 (1992).

- 1 12 Bement, W. M., Mandato, C. A. & Kirsch, M. N. Wound-induced assembly and closure of an  
2 actomyosin purse string in *Xenopus* oocytes. *Current Biology* **9**, 579-587, doi:Doi  
3 10.1016/S0960-9822(99)80261-9 (1999).
- 4 13 Danjo, Y. & Gipson, I. K. Actin 'purse string' filaments are anchored by E-cadherin-mediated  
5 adherens junctions at the leading edge of the epithelial wound, providing coordinated cell  
6 movement. *J Cell Sci* **111**, 3323-3332 (1998).
- 7 14 Heller, D. *et al.* EpiTools: An Open-Source Image Analysis Toolkit for Quantifying Epithelial  
8 Growth Dynamics. *Dev Cell* **36**, 103-116, doi:10.1016/j.devcel.2015.12.012 (2016).
- 9 15 Galko, M. J. & Krasnow, M. A. Cellular and genetic analysis of wound healing in *Drosophila*  
10 larvae. *Plos Biology* **2**, 1114-1126, doi:ARTN e239  
11 10.1371/journal.pbio.0020239 (2004).
- 12 16 Losick, V. P., Fox, D. T. & Spradling, A. C. Polyploidization and Cell Fusion Contribute to  
13 Wound Healing in the Adult *Drosophila* Epithelium. *Current Biology* **23**, 2224-2232,  
14 doi:10.1016/j.cub.2013.09.029 (2013).
- 15 17 Razzell, W., Wood, W. & Martin, P. Recapitulation of morphogenetic cell shape changes  
16 enables wound re-epithelialisation. *Development* **141**, 1814-1820, doi:10.1242/dev.107045  
17 (2014).
- 18 18 Fletcher, A. G., Osterfield, M., Baker, R. E. & Shvartsman, S. Y. Vertex Models of Epithelial  
19 Morphogenesis. *Biophysical Journal* **106**, 2291-2304, doi:10.1016/j.bpj.2013.11.4498 (2014).
- 20 19 Vereshchagina, N. *et al.* The essential role of PP1 beta in *Drosophila* is to regulate nonmuscle  
21 myosin. *Mol Biol Cell* **15**, 4395-4405, doi:10.1091/mbc.E04-02-0139 (2004).
- 22 20 Amano, M. *et al.* Phosphorylation and activation of myosin by Rho-associated kinase (Rho-  
23 kinase). *J Biol Chem* **271**, 20246-20249, doi:DOI 10.1074/jbc.271.34.20246 (1996).
- 24 21 Mizuno, T., Amano, M., Kaibuchi, K. & Nishida, Y. Identification and characterization of  
25 *Drosophila* homolog of Rho-kinase. *Gene* **238**, 437-444, doi:Doi 10.1016/S0378-  
26 1119(99)00351-0 (1999).

- 1 22 Verboon, J. M. & Parkhurst, S. M. Rho family GTPase functions in Drosophila epithelial  
2 wound repair. *Small GTPases* **6**, 28-35, doi:10.4161/21541248.2014.982415 (2015).
- 3 23 Rauzi, M., Lenne, P. F. & Lecuit, T. Planar polarized actomyosin contractile flows control  
4 epithelial junction remodelling. *Nature* **468**, 1110-1114, doi:10.1038/nature09566 (2010).
- 5 24 Park, J. A., Atia, L., Mitchel, J. A., Fredberg, J. J. & Butler, J. P. Collective migration and cell  
6 jamming in asthma, cancer and development. *J Cell Sci* **129**, 3375-3383,  
7 doi:10.1242/jcs.187922 (2016).
- 8 25 Sadati, M., Qazvini, N. T., Krishnan, R., Park, C. Y. & Fredberg, J. J. Collective migration and  
9 cell jamming. *Differentiation* **86**, 121-125, doi:10.1016/j.diff.2013.02.005 (2013).
- 10 26 Chepizhko, O. *et al.* From jamming to collective cell migration through a boundary induced  
11 transition. *Soft Matter* **14**, 3774-3782, doi:10.1039/c8sm00128f (2018).
- 12 27 Anon, E. *et al.* Cell crawling mediates collective cell migration to close undamaged epithelial  
13 gaps. *P Natl Acad Sci USA* **109**, 10891-10896, doi:10.1073/pnas.1117814109 (2012).
- 14 28 Brugues, A. *et al.* Forces driving epithelial wound healing. *Nat Phys* **10**, 684-691,  
15 doi:10.1038/Nphys3040 (2014).
- 16 29 Fenteany, G., Janmey, P. A. & Stossel, T. P. Signaling pathways and cell mechanics involved in  
17 wound closure by epithelial cell sheets. *Current Biology* **10**, 831-838, doi:Doi 10.1016/S0960-  
18 9822(00)00579-0 (2000).

19

## 20 **Acknowledgements**

21 Thank you to all members of the Mao group, Martin Raff, David Ish-Horowicz and  
22 Michael Murrell for providing feedback on the manuscript. Thank you to Andreas  
23 Hoppe and Davide Heller for developing additional plugins in EpiTools for this work.

24

1 **Author Contributions**

2 RJT and YM conceived the project. RJT performed the experiments and analysed  
3 the data. MFS and SB developed the vertex model of wound healing. MFS ran  
4 simulations and analysed the data. RJT, MFS, SB and YM wrote the manuscript.

5

6 **Author Information**

7 RJT is funded by a Medical Research Council Skills Development Fellowship  
8 (MR/N014529/1). MFS is supported by an EPSRC funded PhD Studentship at the  
9 UCL Department of Physics and Astronomy. SB acknowledges support from a  
10 Strategic Fellowship at the UCL Institute for the Physics of Living Systems. YM is  
11 funded by a Medical Research Council Fellowship (MR/L009056/1), a UCL  
12 Excellence Fellowship, and a NSFC International Young Scientist Fellowship  
13 (31650110472). This work was also supported by MRC funding to the MRC LMCB  
14 University Unit at UCL (award code MC\_U12266B).

15

16 **Competing Interests**

17 We confirm that the authors have no competing interests.

18

19

## 1 **Methods**

2

### 3 ***Drosophila* strains**

4 *Drosophila* stocks were raised on conventional cornmeal media at 25°C. The following  
5 alleles and transgenes were used experimentally: *shg*-GFP<sup>1</sup> (II, referred to as Ecad-GFP),  
6 *sqh*-mCherry<sup>2</sup> (III), *rn*-GAL4 (III, MiMIC insertion), UAS-*Rok*-RNAi (II, VDRC KK Library),  
7 UAS-*Mbs*-RNAi (II, VDRC KK Library), *sqh*-GFP<sup>3</sup> (II), *shg*-tdTomato<sup>1</sup> (II, referred to as Ecad-  
8 tdTomato), *sqh*<sup>AX3</sup>(X)<sup>4</sup>. The experimental genotypes used and their corresponding data are  
9 shown in Table 1.

10

11 **Table 1. *Drosophila* experimental genotypes and corresponding data**

| <b>Genotype</b>                                                                                 | <b>Corresponding Figures and Videos</b>                                                                                                                         |
|-------------------------------------------------------------------------------------------------|-----------------------------------------------------------------------------------------------------------------------------------------------------------------|
| <i>sqh</i> <sup>AX3</sup> ; <i>sqh</i> -GFP, Ecad-tdTomato                                      | Fig. 1a, c, Fig. 2c, Supplementary Video 1                                                                                                                      |
| <i>yw</i> ; Ecad-GFP/+; <i>rn</i> -GAL4/+ (referred to as WT)                                   | Fig. 1b, e-g, Fig. 2 d-h, j, Fig. 4b, e-f, Supplementary Fig. 1a-d, Supplementary Fig. 4a-d, Supplementary Fig. 5, Supplementary Video 2, Supplementary Video 5 |
| Ecad-GFP; <i>sqh</i> -mCherry, <i>pnr</i> -GAL4                                                 | Fig. 1d                                                                                                                                                         |
| <i>yw</i> ; Ecad-tdTomato                                                                       | Fig. 2i, j                                                                                                                                                      |
| <i>yw</i> ; Ecad-GFP/UAS- <i>Mbs</i> -RNAi; <i>rn</i> -GAL4/+ (referred to as <i>Mbs</i> -RNAi) | Fig. 4b-c, e-f, Supplementary Fig. 4a-d, Supplementary Fig. 5, Supplementary Fig. 6a-e, Supplementary Video 6                                                   |

|                                                                                               |                                                                                                             |
|-----------------------------------------------------------------------------------------------|-------------------------------------------------------------------------------------------------------------|
| <i>yw</i> ; <i>Ecad-GFP/UAS-Rok-RNAi</i> ; <i>rn-GAL4/+</i> (referred to as <i>Rok-RNAi</i> ) | Fig. 4b, d-f, Supplementary Fig. 4a-d, Supplementary Fig. 5, Supplementary Fig. 7a-e, Supplementary Video 7 |
|-----------------------------------------------------------------------------------------------|-------------------------------------------------------------------------------------------------------------|

1

2

### 3 **Live imaging of wing imaginal discs**

4 Late third instar wing imaginal discs were cultured in Shields and Sang M3 media (Sigma)  
5 supplemented with 2% FBS (Sigma), 1% pen/strep (Gibco), 3ng/ml ecdysone (Sigma) and  
6 2ng/ml insulin (Sigma). Wing discs were cultured under filters, as described elsewhere<sup>5</sup>.

7 Wing discs were imaged on a Zeiss LSM 880 microscope with Airyscan at 512x512

8 resolution with a 63x objective (NA 1.4) at 5x zoom. Laser power of 0.2-0.3% was used and

9 images were captured with a 0.5 $\mu$ m z-spacing. Time intervals varied depending on the

10 experiment. For single channel wounding experiments, the first 25 images were captured

11 with no time interval (to visualise the fast, early dynamics of wound closure, using a sufficient

12 z-stack depth to include all cells in the field of view). For two channel wounding experiments,

13 the first 12 images were captured with no time interval. Subsequent imaging was then

14 performed with a time interval of 3 minutes for both single and two channel experiments, with

15 a total z-stack depth of approximately 40  $\mu$ m, until wounds closed. For experiments

16 measuring unwounded intercalation rates, a time interval of 3 minutes was used for a total

17 imaging time of 2 hours.

18

### 19 **Wounding of tissues**

20 Wing discs were wounded using a pulsed Chameleon Vision II TiSa laser (Coherent), tuned

21 to 760nm at 45% power. Ablation was performed on small, manually defined circular regions

22 of interest (ROIs) that coincided with the tricellular junctions shared between all cells to be

1 ablated. This was necessary, as larger regions of interest produced significant  
2 autofluorescent scarring that made subsequent image analysis impossible. Furthermore,  
3 ablation of larger regions led to cavitation, which masked the initial recoil dynamics of the  
4 wound. Ablation was performed in a single z-plane, at the level of the adherens junctions.

5

## 6 **Segmentation and tracking of wound time-lapse images**

7 Ecad time-lapse images were first deconvolved using Huygens (Scientific Volume Imaging).  
8 Deconvolved images were segmented, tracked and analysed using Epitools<sup>6</sup>. The following  
9 MATLAB-based analysis modules were implemented in the following order: Adaptive  
10 projection (manually corrected with an additional plugin, Andreas Hoppe, unpublished),  
11 Contrast Enhancement (CLAHE), Cell segmentation, Automatic seed tracking, Re-  
12 segmentation, Generate skeletons. The settings used for “Adaptive projection” and “Cell  
13 segmentation” were selected on a case-by-case basis, to give the best result for each time-  
14 lapse image. Default settings were used for “Contrast Enhancement (CLAHE). “Automatic  
15 seed tracking” was implemented so that each cell had a single seed, where possible.  
16 Corrected seeds were used for “Re-segmentation” and the resulting corrected segmentation  
17 was used to “Generate skeletons”. The remaining segmentation and tracking was performed  
18 using Epitools’ Icy Plugins. Skeletons were manually corrected using “CellEditor”. The  
19 corrected skeletons were used to implement “CellGraph”, which was run using the  
20 “STABLE\_MARRIAGE” algorithm for tracking with a Propagation Limit of 5 frames without  
21 cutting any border lines. Any tracking errors were manually corrected (additional tool, Davide  
22 Heller, unpublished).

23

## 24 **Quantitative analysis of wound time-lapse images**

25 The following data was quantified and exported using the “CellOverlay” Icy plugin in  
26 Epitools<sup>6</sup>. Statistical analysis and curve fitting was performed in Prism (GraphPad):

1

2 *Wound area* – the killed cells and resulting wound were manually selected using the  
3 “CELL\_COLOR\_TAG” tool and data exported. Wound area was then expressed as a  
4 percentage of the total area of all the killed cells.

5

6 *Wound edge junctions remaining* – the initial number of wound edge cells was counted  
7 manually prior to wounding. The polygon number of the wound was quantified using the  
8 “CELL\_COLOR\_TAG” tool. The wound polygon number was expressed as a percentage of  
9 the initial number of wound edge cells. When percentage of junctions remaining data was  
10 pooled from multiple wing discs a LOWESS curve was fitted to the data.

11

12 *Distinction of fast and slow closure phases* – a two-phase exponential decay curve was fitted  
13 to the cell area data pooled from multiple wing discs. The fast and slow phases of closure  
14 are represented by the ranges of the fast and slow exponential decays respectively.

15

16 *Intercalation rates* – Intercalation rates were calculated in two ways: (1) To calculate the  
17 mean wound edge intercalation rate for an entire time-lapse image, the total percentage of  
18 junctions lost was divided by the total time to give a value of percentage of junctions lost per  
19 min (Fig. 4f). (2) To calculate the intercalation rate for unwounded tissues the  
20 “EDGE\_T1\_TRANSITIONS” tool was run and data exported. Analysing the raw data, any T1  
21 transition that was maintained for >1 time point was scored as a junction loss event (to allow  
22 comparison to wound edge junction losses during wound edge intercalation). The total  
23 number of cells was quantified by exporting data from the “TRACKING\_STABLE\_ONLY”  
24 tool. Intercalation rate was calculated as the number of junctions lost per 1000 cells per  
25 hour. The same units were used for wound edge intercalations. However, because a junction



1 loss during a T1 transition in an unwounded tissue involves 4 cells and a junction loss at the  
2 wound edge involves only 3 cells, the wound edge intercalation rate was adjusted by a factor  
3 of 0.75 (Fig. 1g).

4

5 *Polygon distributions of wound edge cells* – initial wound edge cells were selected manually  
6 using the “CELL\_COLOR\_TAG” tool, prior to wounding. These identities were propagated  
7 through all time points. Data was exported and the polygon distributions quantified by  
8 pooling all data from all wound edge cells in all wing discs. Polygon distributions were  
9 quantified at time points prior to and immediately after wounding and immediately after  
10 closure.

11

12 *Cell elongation* – cell elongation was calculated by dividing the major and minor axis length  
13 of best fit ellipses (exported from the “CELL\_COLOR\_TAG” tool). The mean elongation of  
14 pooled cells was calculated prior to wounding. Changes in mean cell elongation were  
15 expressed as a percentage of the initial mean elongation.

16

17 Overlay images were generated by selecting the relevant “CellOverlay” tool layer.

18

## 19 **Myosin II quantification**

20 Myosin II was quantified during the first hour post wounding of *sqh*<sup>AX3</sup>, *sqh*-GFP, Ecad-  
21 tdTomato wing discs, using Sqh-GFP as a reporter. Because these experiments were  
22 performed in a *sqh*<sup>AX3</sup> null background, all molecules of Myosin II were tagged with GFP.

23 First, raw (not deconvolved) Sqh-GFP images were background subtracted using the Rolling  
24 Ball tool in FIJI with a radius of 12 pixels. Maximum intensity projections (MIPs) of Sqh-GFP  
25 images were then generated, which excluded any signal from the overlying peripodial

1 membrane cells. The CellGraph function of Epitools was run on the Sqh-GFP MIPs using the  
2 segmented skeleton images from the corresponding deconvolved Ecad-tdTomato channel  
3 (segmentation performed as above).

4 Junctions were selected manually using the “EDGE\_COLOR\_TAG” CellOverlay tool  
5 in Epitools<sup>6</sup>. Edge Intensity Buffer and Vertex Intensity Buffer were set to 3 and Selection  
6 Mode 1 was used to exclude vertices from the quantification. Two groups of junctions were  
7 selected in each movie; 1) junctions in contact with the wound edge in each frame and 2) 10  
8 junctions in the surrounding tissue that persisted for the entire time window of quantification,  
9 were more than one cell diameter away from the wound and were not associated with a cell  
10 division event. Mean Sqh-GFP intensities were exported for all tagged junctions, with the  
11 mean calculated from the top 90% of pixel intensities for each junction (to exclude any dark  
12 pixels that were outside of the cell’s cortex). Wound edge junction intensities were  
13 normalised to the mean intensity of the 10 junctions in the surrounding tissue for each time  
14 point. The relative normalised intensity of wound edge junctions was then calculated by  
15 dividing by the mean normalised intensity of wound edge junctions in the time point prior to  
16 wounding ( $t_0$ ). A LOWESS curve was fitted to the data using Prism (GraphPad).

17

### 18 **Assigning cell row fates**

19 Cells were assigned row identities using the “CELL\_COLOR\_TAG” CellOverlay tool in  
20 Epitools<sup>6</sup>. This was done prior to wounding and these identities were propagated in time  
21 through the entire movie. Cells could therefore change rows over time (by intercalation), but  
22 still retained their initially assigned identities (Supplementary Video 5).

23

### 24 **Vertex model**

1 We model the apical surface of the tissue as a 2D network of polygonal cells, with cell-cell  
2 interfaces represented by straight edges, and three way junctions by vertices. The total  
3 mechanical energy of the tissue is given by<sup>7</sup>:

4

$$5 \quad E = \sum_{\alpha} \frac{1}{2} K (A_{\alpha} - A_{\alpha}^0)^2 + \sum_{\alpha} \frac{1}{2} \Gamma P_{\alpha}^2 + \sum_{\langle i,j \rangle} \Lambda_{ij} l_{ij}$$

6

7 where the individual cells are labelled by  $\alpha$ , and the edges connecting vertices  $i$  and  $j$  by  
8  $\langle i,j \rangle$  (Supplementary Fig. 2). The first term represents the area elasticity of the cells, with  
9 elastic modulus  $K$ ,  $A_{\alpha}$  is the area of cell  $\alpha$  and  $A_{\alpha}^0$  is the preferred area. The second term  
10 represents contractile energy of the actomyosin cortex for a cell with perimeter  $P_{\alpha}$ , and  
11 contractile tension,  $\Gamma$ . The final term represents the energy cost due to line tensions  $\Lambda_{ij}$   
12 acting on edges of length  $l_{ij}$  which is a combination of cell-cell adhesion and cortical tension.  
13 Negative line tension implies cell-cell adhesion dominates over cortical tension, such that  
14 cells tend to maximize the length of junctions between their neighbors. The net mechanical  
15 force acting on the vertex  $i$  is given by  $\mathbf{F}_i = -\partial E / \partial \mathbf{x}_i$ . Assuming over-damped dynamics, the  
16 equation of motion for vertex  $i$  is:

17

$$18 \quad \mu \frac{d\mathbf{x}_i}{dt} = \mathbf{F}_i$$

19

20 where  $\mu$  is the coefficient of friction.

21

1 In this study, we non-dimensionalize energy by  $K/A_0^2$  and length by  $A_0^{1/2}$ , resulting in  
2 normalized contractility  $\bar{\Gamma} = \Gamma/KA_0$  and normalized line tension  $\bar{\Lambda} = \Lambda/KA_0^{3/2}$ . Time is non-  
3 dimensionalized by the  $T^* = \mu/KA_0$ . The equation of motion is discretized as:

4

$$5 \quad \bar{\mathbf{x}}_i(t + \Delta t) = \bar{\mathbf{x}}_i(t) + \frac{\Delta t}{T^*} \bar{\mathbf{F}}_i,$$

6

7 where  $\Delta t$  is the timestep. See Table 2 for a complete list of default parameter values.

8

9 As the tissue relaxes by minimizing mechanical energy, cell edges may shrink due to  
10 contractile forces. If an edge length goes below a small threshold length,  $L_{T1}$ , an  
11 intercalation, or T1 transition, occurs, in which a new edge is formed perpendicular to the  
12 original junction, if it results in a lower energy. To keep the system out of equilibrium, we  
13 introduce two sources of activity: cell division, and line tension fluctuations, as described  
14 below.

15

16 *Cell division* - we implemented a simplified model of the cell cycle, with cells in one of three  
17 phases; resting, growing or dividing. Cells start in the resting phase, with the default  
18 preferred area  $A_0$ . Once they have reached a threshold age, they transition to mitosis at a  
19 fixed rate. In mitosis, the preferred area of the cell doubles over a period of 30 minutes,  
20 resulting in growth of the cell. After 30 minutes, the cell is divided into two new cells by  
21 creating a new edge between two of the cell edges which is chosen to minimize the system  
22 energy. This results in division of elongated cells along their short axis.

23

1 *Line tension fluctuations* - to model myosin II fluctuations, we allow the line tensions to  
2 fluctuate over time, adapting the model introduced in Curran *et al.*<sup>8</sup> the line tension  $\Lambda_{ij}$  on the  
3 edge joining vertices  $i$  and  $j$  evolves over time as:

$$4 \quad \frac{d\bar{\Lambda}_{ij}}{dt}(t) = -\frac{1}{\tau_m}(\bar{\Lambda}_{ij}(t) - \bar{\Lambda}_0) + \xi_{ij}(t)$$

5 where  $\tau_m$  is a persistence time of myosin,  $\bar{\Lambda}_0$  is the mean line tension, and  $\xi_{ij}$  is an  
6 uncorrelated white noise obeying:

$$7 \quad \langle \xi_{ij}(t) \xi_{kl}(t') \rangle = \frac{2\sigma_m^2}{\tau_m} \delta(t - t') \delta_{ik} \delta_{jl}.$$

8 The line tension deviation,  $\sigma_m$ , controls the amount of fluctuation around the mean, and is  
9 equal to the standard deviation of the line tension over time.

10

## 11 **Modelling laser ablation and wound healing**

12 Wounds in the epithelium are created by removing any cell that lies partially or fully within a  
13 circle of radius  $R_w$ . As material remains within the wound, but the actomyosin cortices are  
14 disrupted, we remove all contractility within the wound. The polygons constituting the wound  
15 have an area elasticity term with elastic modulus  $K_w$  and zero contractility. As tissue material  
16 leaves the gap during wound closure, the elastic modulus decreases to zero over 10  
17 minutes. At the same time, tension in the purse-string surrounding the wound increases from  
18 the mean line tension,  $\bar{\Lambda}_0$ , to  $\bar{\Lambda}_{ps}$ , the purse-string tension. The resulting effect is a rapid  
19 expansion of wound area after ablation, followed by a contraction back to the original size  
20 over 10 minutes. We simulate the tissue dynamics for 300 minutes, or until the wound  
21 closes.

22

## 23 **Model implementation**

1 The model is implemented using Surface Evolver<sup>9</sup>. 200 cells are generated using a Voronoi  
2 tessellation and relaxed, without fluctuations and divisions, to a steady state. The simulation  
3 is then run, with divisions and fluctuating line tensions, until the tissue has grown to 250  
4 cells. Next, the wound is ablated, and the simulation is run until wound closure or for a  
5 maximum of 300 minutes.

6

## 7 **Model parameters**

8 We use the same normalized contractility  $\bar{\Gamma}$  as in Farhadifar *et al.*<sup>7</sup>. Due to differences  
9 between our models, such as division rules, the same set of parameters do not apply. The  
10 mean division time is taken from Heller *et al.*<sup>6</sup>. The wound radius is chosen to give a wound  
11 with a similar number of initial edges as in experiments. We use the same tension recovery  
12 time for line tension  $\tau_m$  and time scale  $T^*$  as in Curran *et al.*<sup>8</sup>. The line tension deviation  $\sigma_m$ ,  
13 normalized cell tension  $\bar{\Lambda}_0$ , and normalized purse-string tension  $\bar{\Lambda}_{ps}$  are fit against wounded  
14 and unwounded intercalation rates, and wound closure time in WT, Mbs RNAi, and Rok  
15 RNAi experiments.

16

17 **Table 2. Default parameters used**

| Parameter                       | Symbol               | Value               |
|---------------------------------|----------------------|---------------------|
| Normalized contractility        | $\bar{\Gamma}$       | 0.04                |
| Normalized cell line tension    | $\bar{\Lambda}_0$    | 0.00                |
| Normalized purse string tension | $\bar{\Lambda}_{ps}$ | 0.18                |
| Preferred cell area             | $A^0$                | 100 $\mu\text{m}^2$ |
| Time scale                      | $T^*$                | 250 s               |
| Cell line tension deviation     | $\sigma_m$           | 0.10                |

|                                |            |                 |
|--------------------------------|------------|-----------------|
| Tension recovery time          | $\tau_m$   | 150s            |
| Wound radius                   | $R_w$      | 1.5             |
| Time step                      | $\Delta t$ | 6.25 s          |
| Intercalation threshold length | $L_{T1}$   | 1 $\mu\text{m}$ |
| Mean division time             |            | 22.2 hours      |

1

2

### 3 **Live imaging of embryos**

4 Adult *yw*; *Ecad-tdTomato* flies were placed in laying cages sealed by agar plates (water 70%  
5 v/v, apple juice 30% v/v, agar (Sigma) 3% w/v, methylparaben (Sigma) 0.05% w/v) coated  
6 by a small amount of yeast overnight at 25°C. Embryos were recovered by rinsing the agar  
7 plates with water into a basket. Embryos were dechorionated for ~1 minute in 12% sodium  
8 hypochlorite solution and rinsed thoroughly with water. Embryos were returned to agar to  
9 prevent desiccation and stage 13/14 embryos were selected by eye. Stage 13/14 embryos  
10 were affixed to coverslips using heptane glue, with their ventrolateral sides facing the  
11 coverslip. Coverslips were then attached to metal slide frames (Leica) using double sided  
12 tape and embryos were covered in halocarbon oil 27 (Sigma). Embryos were wounded as  
13 above and imaged the same as wing discs, except that 2 minute time intervals were used  
14 after the first 25 time points had been acquired. Embryos were allowed to develop to  
15 hatching after imaging, to confirm that the imaging process had not been phototoxic.  
16 Segmentation of cells was performed as described above.

17

### 18 **Comparing intercalation in embryos and wing discs**

19 As a measure of how much wound edge intercalation had occurred during embryonic and  
20 wing disc wound closure, the percentage of cells remaining close to the centre of the wound

1 was quantified. A circle 5% the area of the original wound was drawn where the centre of the  
2 wound was immediately prior to closure. Any cell that intersected this circle immediately after  
3 wound closure was scored as having not intercalated away from the wound. The number of  
4 cells was then expressed as a percentage of the total number of starting wound edge cells.

5

## 6 **Single junction ablations**

7 Nanoablation of single junctions was performed to provide a measure of junctional tension.  
8 Wing discs were mounted as for wounding experiments and imaged using the same  
9 microscope. Narrow rectangular ROIs were drawn across the centre of single junctions and  
10 this region was ablated using the same settings used to wound wing discs (see above).  
11 Wing discs were imaged continuously in a single plane using identical settings as described  
12 above, except that 10x zoom was used. The initial recoil rate of vertices at the ends of  
13 ablated junctions was quantified by measuring the change in distance between the vertices  
14 and dividing by the initial time step.

15

## 16 **Statistical Information**

17 The results of all statistical test are thoroughly reported in figure legends. Appropriate  
18 statistical tests were chosen based on data distributions. Kolmogorov-Smirnov and *t*-tests  
19 were two-tailed. For biological experiments, replicates represent wing imaginal discs from  
20 different animals. Because the segmentation and tracking process is extremely labour  
21 intensive, for each genetic condition 5 replicates were used. This was deemed sufficient, as  
22 clear statistical differences could be observed between genotypes. 12 replicate vertex model  
23 simulations were run for each parameter set.

24

## 25 **Data Availability Statement**



1 The data that support the findings of this study are available from the corresponding author  
2 upon reasonable request.

3

4

## 5 **References**

- 6 1 Huang, J., Zhou, W. K., Dong, W., Watson, A. M. & Hong, Y. Directed, efficient, and  
7 versatile modifications of the *Drosophila* genome by genomic engineering. *P Natl*  
8 *Acad Sci USA* **106**, 8284-8289, doi:10.1073/pnas.0900641106 (2009).
- 9 2 Martin, A. C., Kaschube, M. & Wieschaus, E. F. Pulsed contractions of an actin-  
10 myosin network drive apical constriction. *Nature* **457**, 495-U411,  
11 doi:10.1038/nature07522 (2009).
- 12 3 Royou, A., Field, C., Sisson, J. C., Sullivan, W. & Karess, R. Reassessing the role  
13 and dynamics of nonmuscle myosin II during furrow formation in early *Drosophila*  
14 embryos. *Mol Biol Cell* **15**, 838-850, doi:10.1091/mbc.E03-06-0440 (2004).
- 15 4 Jordan, P. & Karess, R. Myosin light chain-activating phosphorylation sites are  
16 required for oogenesis in *Drosophila*. *Journal of Cell Biology* **139**, 1805-1819,  
17 doi:DOI 10.1083/jcb.139.7.1805 (1997).
- 18 5 Zartman, J., Restrepo, S. & Basler, K. A high-throughput template for optimizing  
19 *Drosophila* organ culture with response-surface methods (vol 140, pg 667, 2013).  
20 *Development* **140**, 2848-2848, doi:10.1242/dev.098921 (2013).
- 21 6 Heller, D. *et al.* EpiTools: An Open-Source Image Analysis Toolkit for Quantifying  
22 Epithelial Growth Dynamics. *Dev Cell* **36**, 103-116, doi:10.1016/j.devcel.2015.12.012  
23 (2016).

- 1 7 Farhadifar, R., Roper, J. C., Algouy, B., Eaton, S. & Julicher, F. The influence of cell  
2 mechanics, cell-cell interactions, and proliferation on epithelial packing. *Current*  
3 *Biology* **17**, 2095-2104, doi:10.1016/j.cub.2007.11.049 (2007).
- 4 8 Curran, S. *et al.* Myosin II Controls Junction Fluctuations to Guide Epithelial Tissue  
5 Ordering. *Dev Cell* **43**, 480-492 e486, doi:10.1016/j.devcel.2017.09.018 (2017).
- 6 9 Brakke, K. A. The Surface Evolver. *Experimental Mathematics* **1**, 141-165,  
7 doi:10.1080/10586458.1992.10504253 (1992).

**Figure 1**

**a** Ecad-tdTomato Sqh-GFP

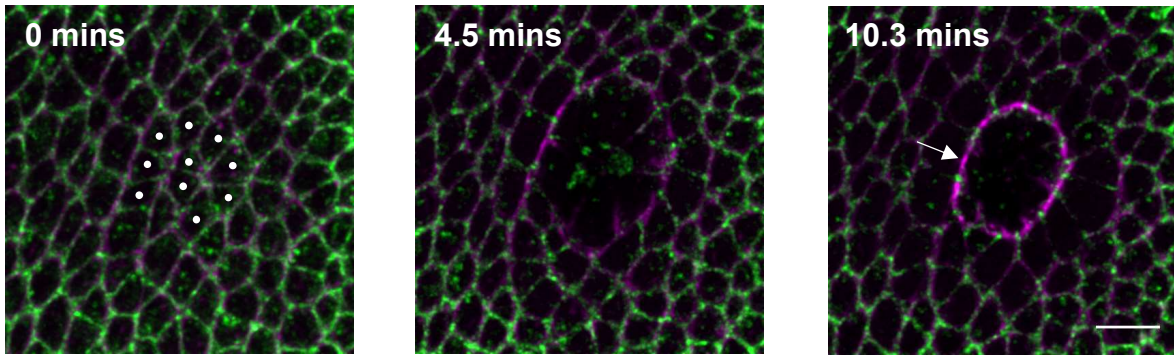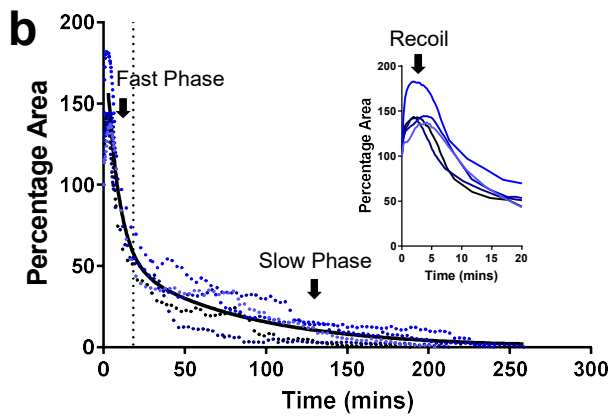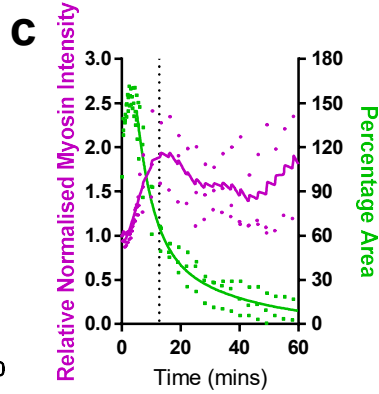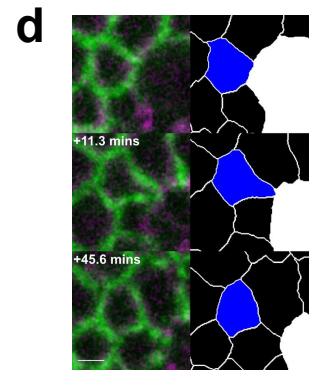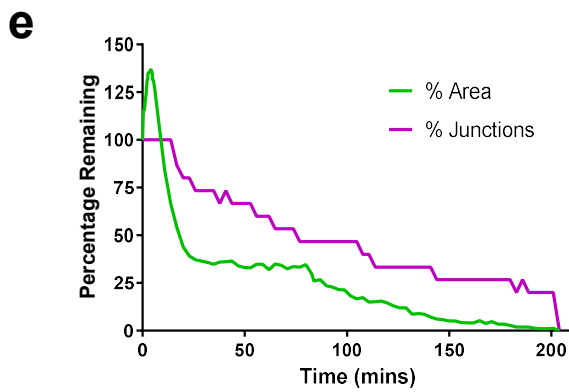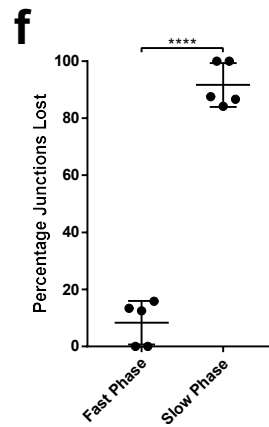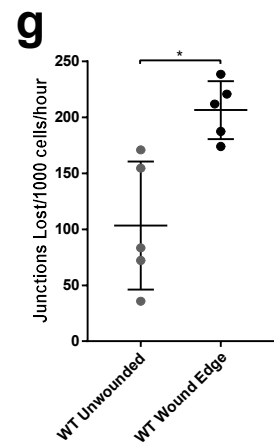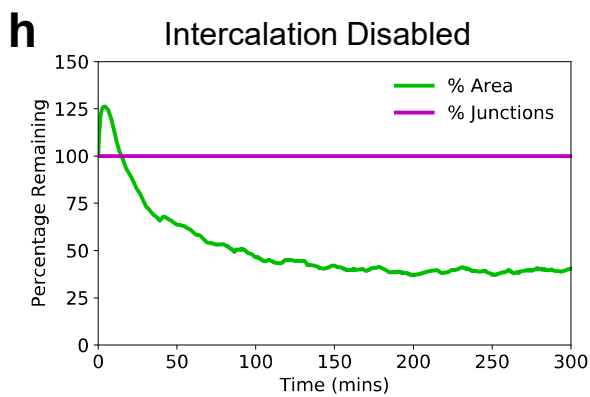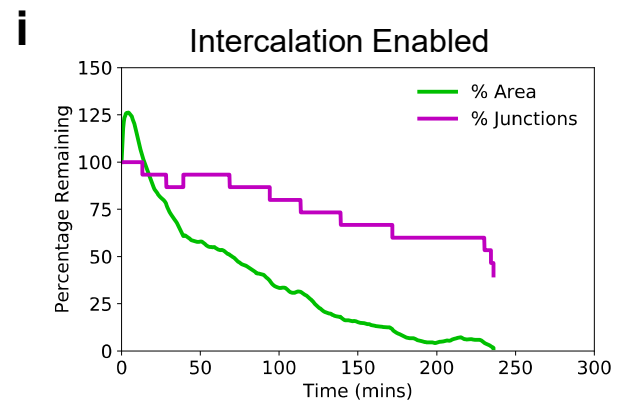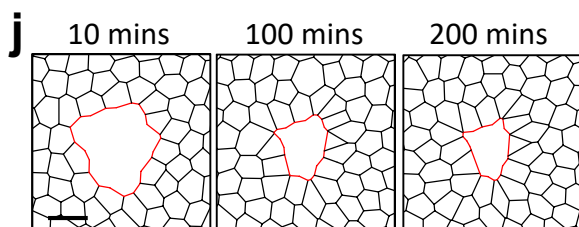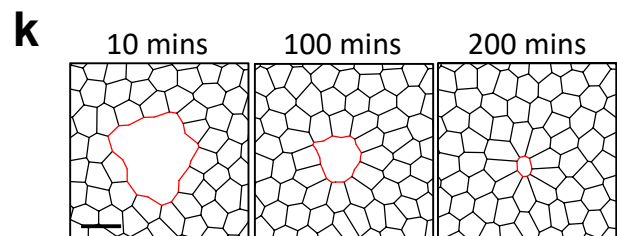

## Figure 1. Wing disc wound closure is punctuated by wound edge intercalation, which can drive wound closure

**a**, Early stages of wound closure in a *sqh*<sup>AX3</sup>; *sqh*-GFP, *Ecad*-tdTomato wing imaginal disc. Cell outlines are marked by *Ecad*-tdTomato (green) and Myosin II by *Sqh*-GFP (magenta). Cells which will be ablated are marked by white circles at 0 mins. Within the first 10 minutes after wounding, a strong accumulation of Myosin II can be seen at the wound's edge in the manner of a purse string (arrow). Images are maximum intensity projections of deconvolved image stacks. Scale bar = 5 $\mu$ m.

**b**, Dynamics of wing disc wound closure. Percentage of original wound area is plotted over time for 5 WT wing discs expressing *Ecad*-GFP (blue dots, the same 5 wing discs are used for all subsequent WT analysis unless otherwise stated). Inset: first 20 mins, showing early expansion (recoil) of the wound. A two-phase exponential decay curve (black line) is fitted to the data after 3 minutes, when the wound begins to reduce in area until close. The transition between fast and slow closure phases of the two-phase exponential decay is marked by a dotted line (18.37 mins).

**c**, Quantification of Myosin II purse string intensity (magenta, left y-axis) and wound percentage area (green, right y-axis) for 3 *sqh*<sup>AX3</sup>; *sqh*-GFP, *Ecad*-tdTomato wing discs during the first hour of wound closure. A two-phase exponential decay curve has been fitted to the area data (green line) and a LOWESS (smoothing window of 10) curve to the Myosin II intensity data (magenta line). The transition between fast and slow closure phases is shown with a dotted line (12.71 mins).

**d**, Example of a single wound edge intercalation in an *Ecad*-GFP; *sqh*-mCherry, *pnr*-GAL4 wing disc. Raw maximum intensity projection (left) and skeletonised images (right, intercalating cell in blue, wound in white) are shown. The junction shared between the intercalating cell and the wound shrinks to a point and a new junction grows in the orthogonal direction. Scale bar = 3 $\mu$ m.

**e**, Quantification of the percentage of starting wound edge junctions (magenta) and wound percentage area (green) for a single *Ecad*-GFP wing disc wound. The percentage of junctions remaining on the wound's edge reduces as intercalations occur until the wound fully closes.

**f**, Quantification of the percentage of junctions lost during the fast (early) and slow (late) phases of WT wound closure. Significantly more junctions are lost during the slow phase (unpaired *t*-test,  $n=5$ ,  $t=17.13$ ,  $df=8$ ,  $p<0.0001$ ). Error bars = SD.

**g**, Quantification of intercalation rate in unwounded WT tissues and at WT wound edges. The intercalation rate is significantly higher at the wound edge (unpaired *t*-test with Welch's correction,  $n=5$ ,  $t=3.667$ ,  $df=5.567$ ,  $p=0.012$ ). Error bars = SD.

**h**, **i**, Vertex model simulations. Percentage of initial wound area and wound junctions after ablation with intercalations (**h**) disabled, and (**i**) enabled.

**j**, **k**, Vertex model simulation images after ablation with intercalations (**j**) disabled, and (**k**) enabled.

**Figure 2**

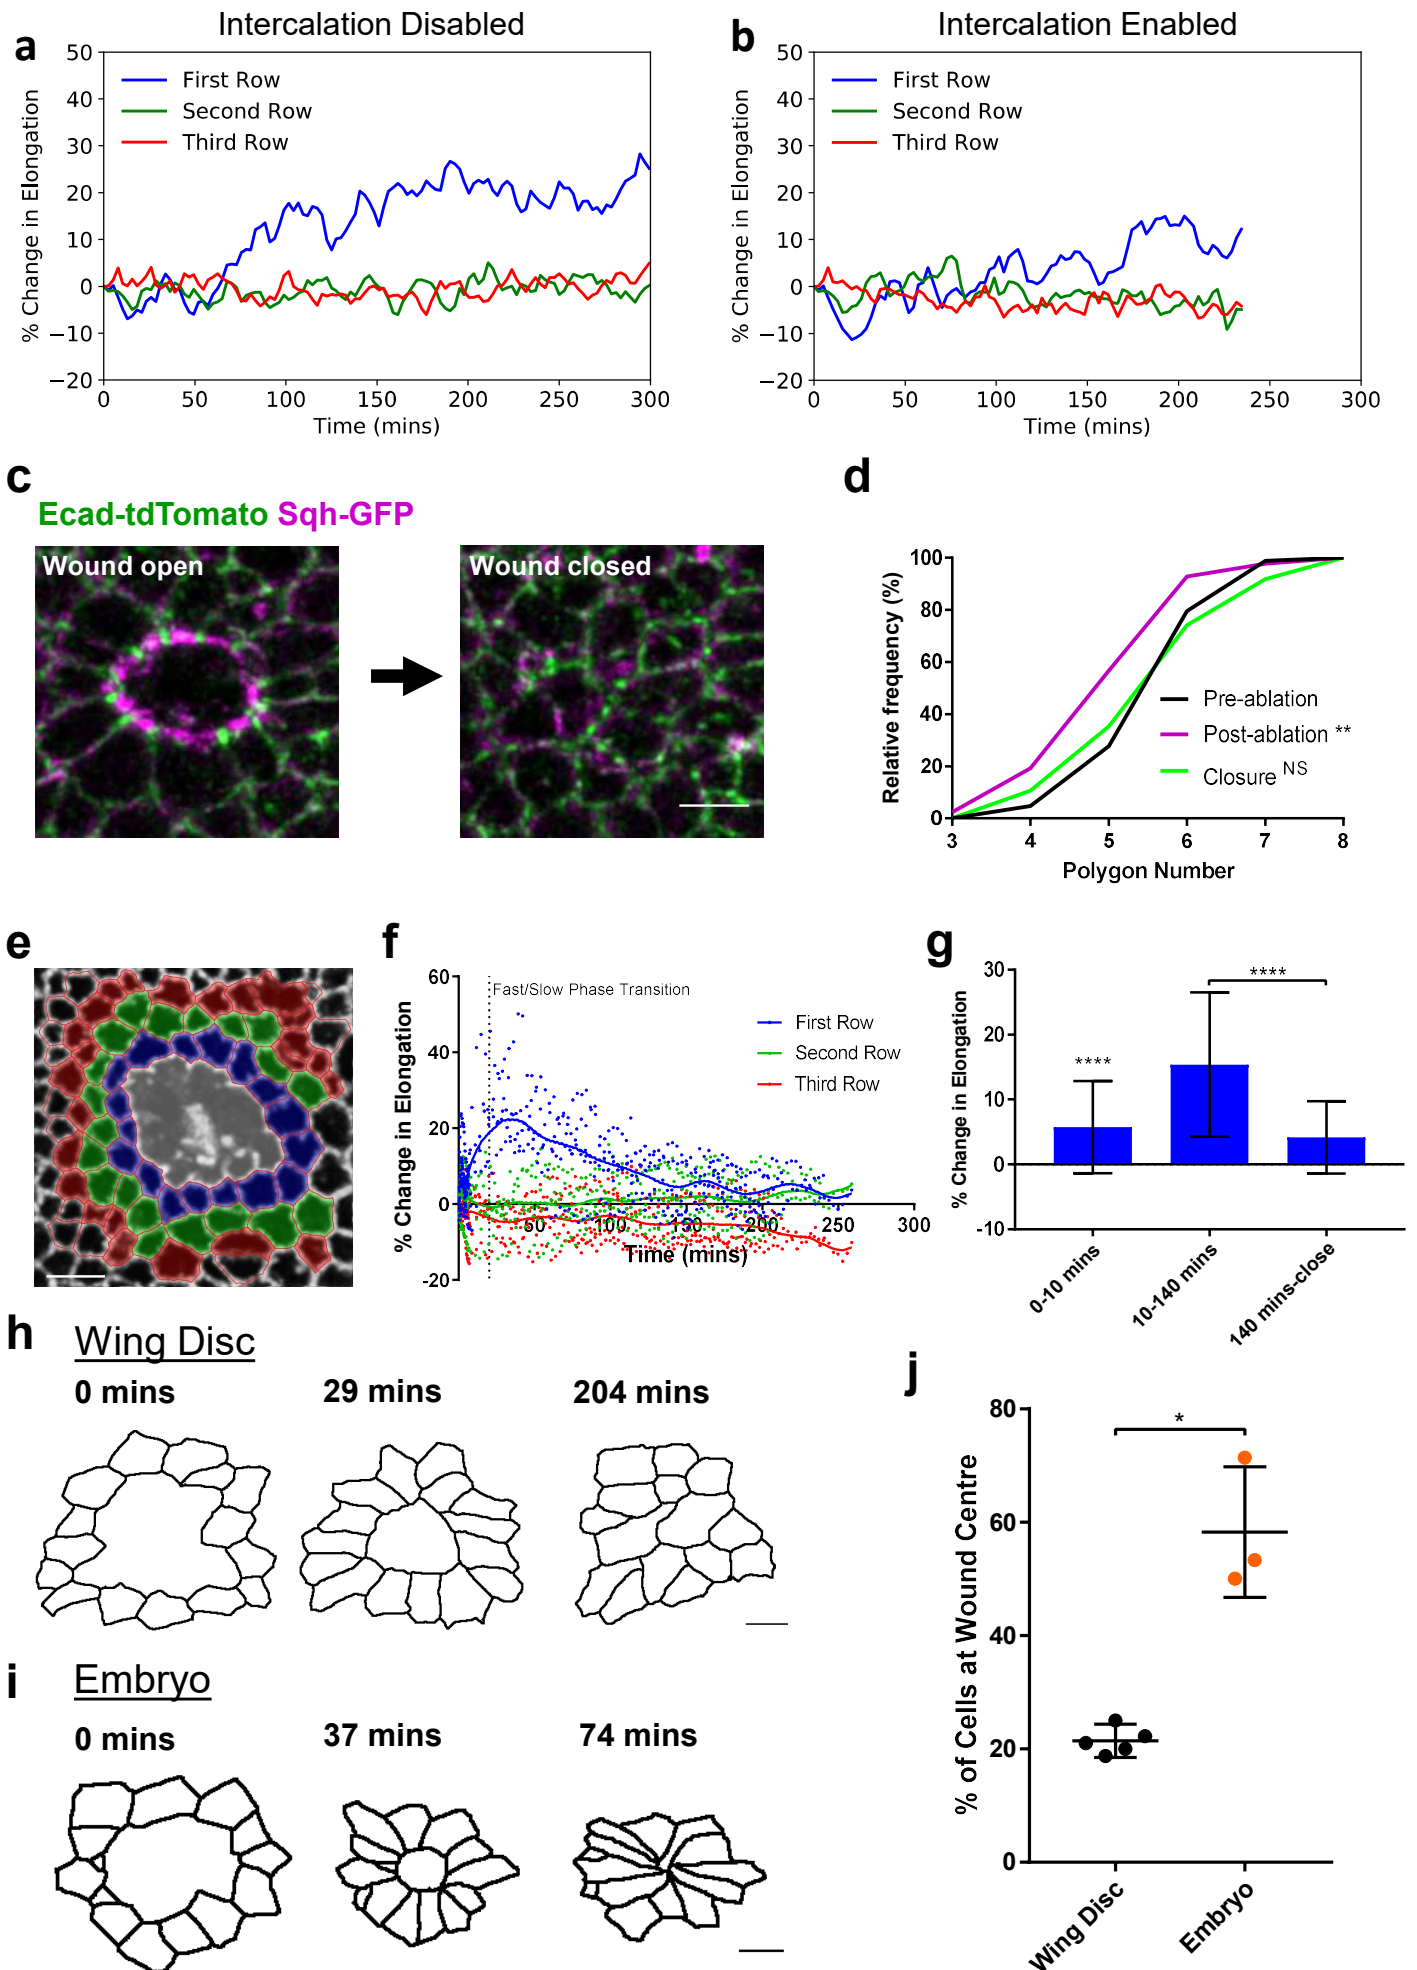

## Figure 2. Wound edge intercalation preserves cell shape

**a, b**, Vertex model simulations. Percentage change in cell elongation, calculated by dividing the major axis by the minor axis of an ellipse fit to each cell, for the first three rows of cells around the wound with intercalations (**a**) disabled, and (**b**) enabled. **c**, Maximum intensity projection images of a wound in a *sqh*<sup>AX3</sup>; *sqh*-GFP, Ecad-tdTomato wing disc before (left) and immediately after (right) wound closure (scale bar = 3 $\mu$ m). **d**, Quantification of wound edge cell polygon number before ablation, immediately after ablation and immediately after wound closure. The distribution of polygon number is significantly shifted left after ablation (Kolmogorov-Smirnov Test,  $n=5$ ,  $D=0.2892$ ,  $p=0.0019$ ) but is restored upon closure (Kolmogorov-Smirnov Test,  $D=0.07583$ ,  $p=0.9692$ ). **e**, Colour coding of the first three rows away from the wound edge (first row blue, second row green, third row red). Image is an adaptive projection of Ecad-GFP overlaid by skeletonised cell outlines. Scale bar = 5 $\mu$ m. **f**, Quantification of the percentage change in mean cell elongation for the first three rows of cells (colour coding as in **e**) over time for 5 WT wounds. LOWESS regression curves (smoothing window = 10) are shown. The transition between fast and slow closure phases is marked by a dotted line (18.37 mins). Elongation transiently increases for just the first row of cells. **g**, Percentage change in mean elongation of first row cells for three time windows; 0-10 mins (wound recoil), 10-140 mins (early wound closure), 140 mins – close (late wound closure). Data is pooled from the data set in (**f**). Cells were significantly elongated during the recoil phase (Wilcoxon Signed Rank Test,  $p<0.0001$ ). Cells were significantly more elongated during early wound closure than during late wound closure (Kolmogorov-Smirnov Test,  $D=0.5703$ ,  $p<0.0001$ ). Error bars = SD. **h, i**, Skeletonised cell outlines of cells starting at the wound edge at three time points in a (**h**) single WT wing disc (scale bar = 3 $\mu$ m) and a (**i**) single WT stage 13 embryo (scale bar = 5 $\mu$ m). **j**, Quantification of the percentage of cells remaining close to the wound's centre after closure, as a measure of intercalation. A significantly higher percentage of cells remain close to the wound centre in embryos ( $n=3$ ) compared to wing discs ( $n=5$ ) (unpaired  $t$ -test with Welch's correction,  $t=5.466$ ,  $df=2.103$ ,  $p=0.0285$ ).

**Figure 3**

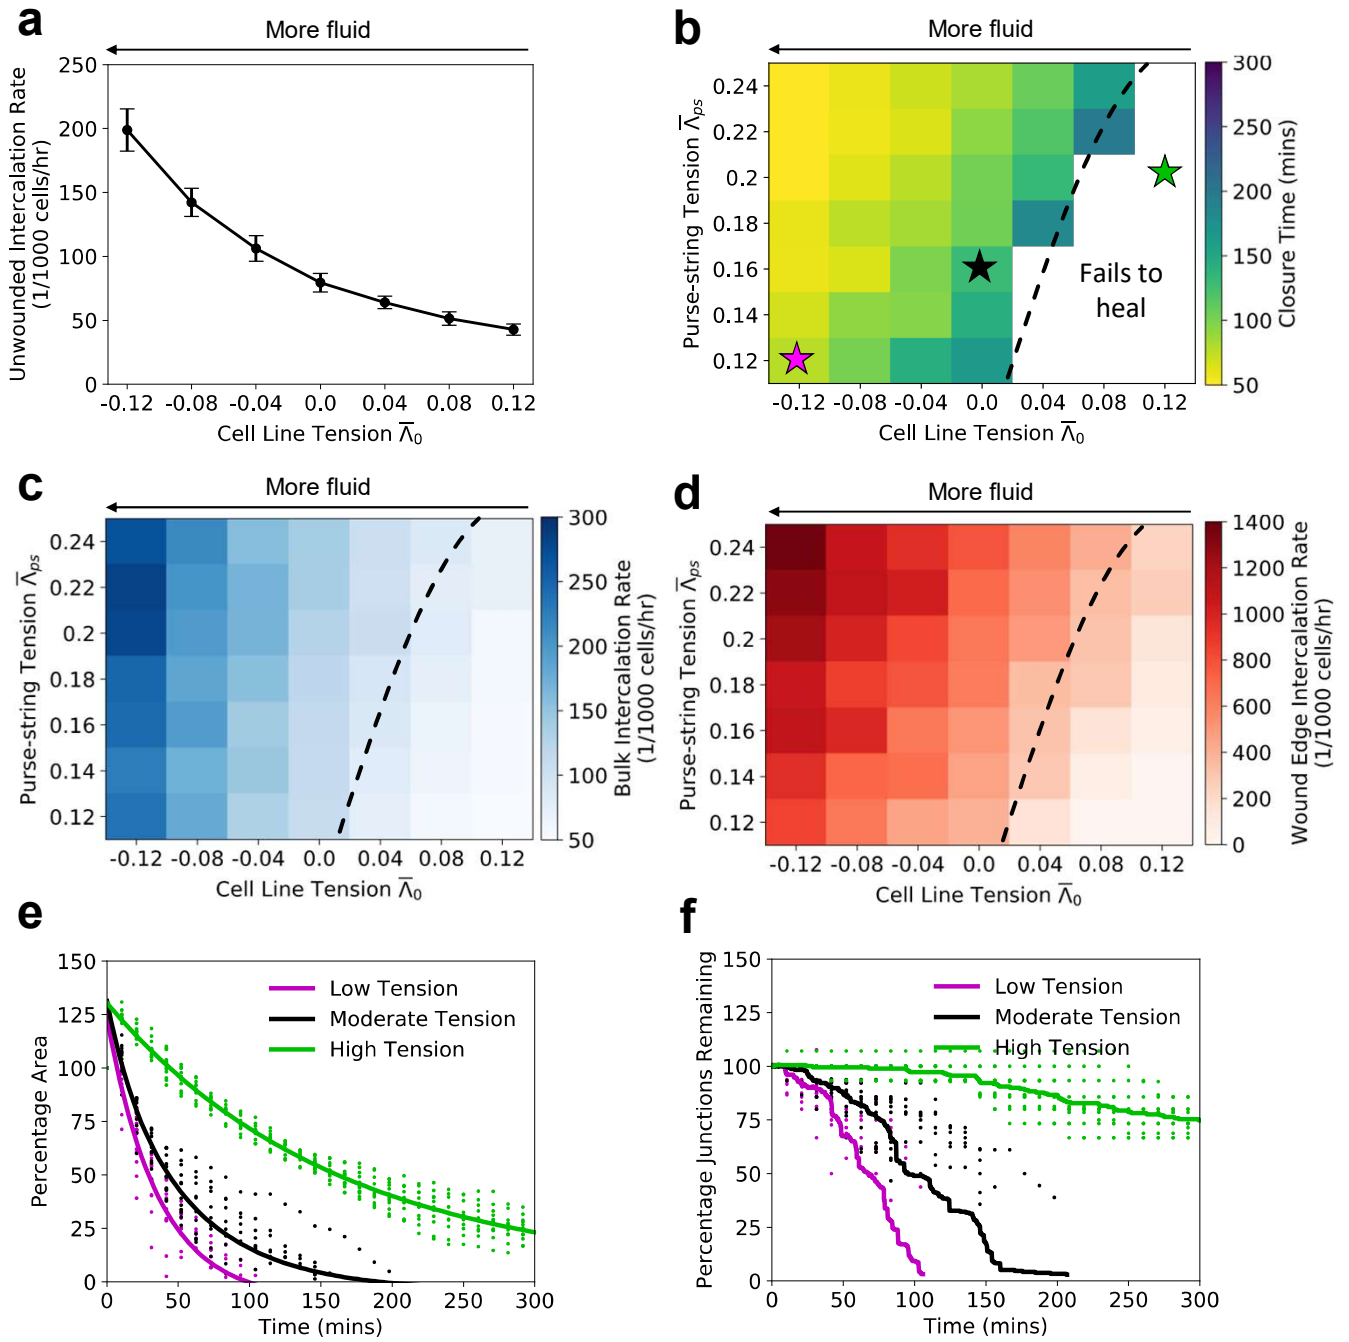

### Figure 3. Reducing tissue contractility enhances fluidity and can speed wound closure

All figures are vertex model simulations. **a**, Intercalation rate in an unwounded tissue against mean cell line tension. Error bars = SD. **b**, Mean wound closure time against cell line tension and purse-string tension. The white region indicates parameter space where wounds fail to close within 300 minutes. The dashed line represents a transition between healing and non-healing regions. The colored stars indicate the parameters used in (e) and (f). **c**, Mean bulk intercalation rate in wounded tissues, and **d**, mean wound edge intercalation rate against cell line tension and purse-string tension. **e**, Percentage of initial area over time for low, moderate, and high tension cases. Points are from simulations, and lines are fit dual exponential curves. **f**, Percentage of initial wound junctions over time for low, moderate, and high tension cases. Points are from simulations; lines are the average over all simulations. For all combinations of tension,  $n = 12$  simulations for each.



**Figure 4**

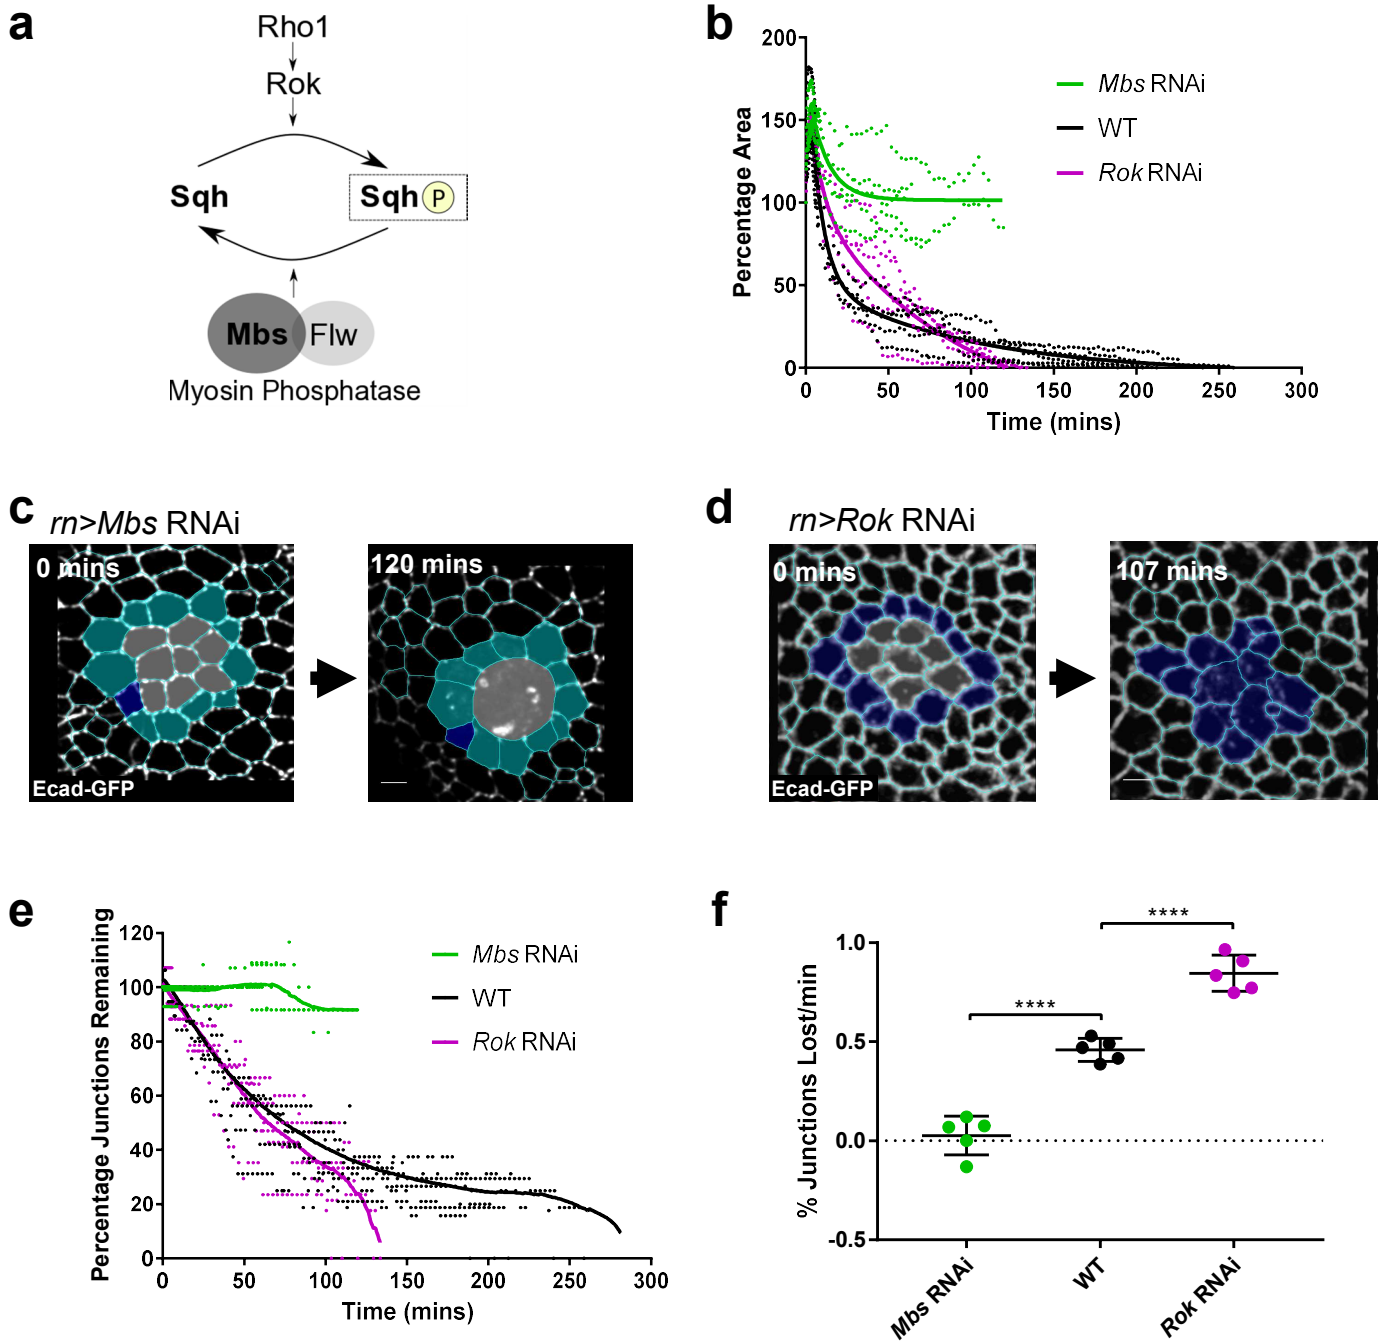

#### Figure 4. Myosin activity controls tissue fluidity and wound closure rate

**a**, Activation of myosin II by phosphorylation of its regulatory light chain (Sqh) can be performed by Rho kinase (Rok) downstream of Rho1. Myosin II inactivation by Sqh dephosphorylation can be performed by the Myosin Phosphatase comprising the Myosin binding subunit (Mbs) and catalytic subunit (Flapwing, Flw). **b**, Quantification of wound closure (as percentage of start wound area) over time in *Mbs* RNAi (green, n=5) and *Rok* RNAi (magenta, n=5) wing discs, compared to WT wound closure (black, n=5). Two-phase exponential decays are fitted after 3 minutes. *Rok* RNAi wounds close faster than WT and *Mbs* RNAi wounds fail to close. **c, d**, Examples of wound healing in **(c)** *Mbs* RNAi and **(d)** *Rok* RNAi before wounding (left) and after wound closure (*Rok* RNAi) or when further segmentation become impossible (*Mbs* RNAi). Cells are colour coded according to whether they undergo intercalation (dark blue) or not (cyan). Images are adaptive projections of Ecad-GFP overlaid by skeletonised cell outlines (scale bars = 3 $\mu$ m). **e**, Quantification of the percentage of initial wound edge junctions over time for *Mbs* RNAi and *Rok* RNAi wing discs (colours and n numbers as in b). LOWESS curves (smoothing window of 5) are fitted to the data. Junctions are lost from the wound edge through intercalation faster in *Rok* RNAi wounds than in WT. *Mbs* RNAi wounds lose very few junctions. **f**, Quantification of mean intercalation rate for *Mbs* RNAi, WT and *Rok* RNAi wounds (colours and n numbers as in b). Intercalation rate is significantly higher in *Rok* RNAi wounds (unpaired *t*-test,  $t=8.026$ ,  $df=8$ ,  $p<0.0001$ ) and significantly lower in *Mbs* RNAi wounds (unpaired *t*-test,  $t=8.503$ ,  $df=8$ ,  $p<0.0001$ ) compared to WT. Error bars = SD.

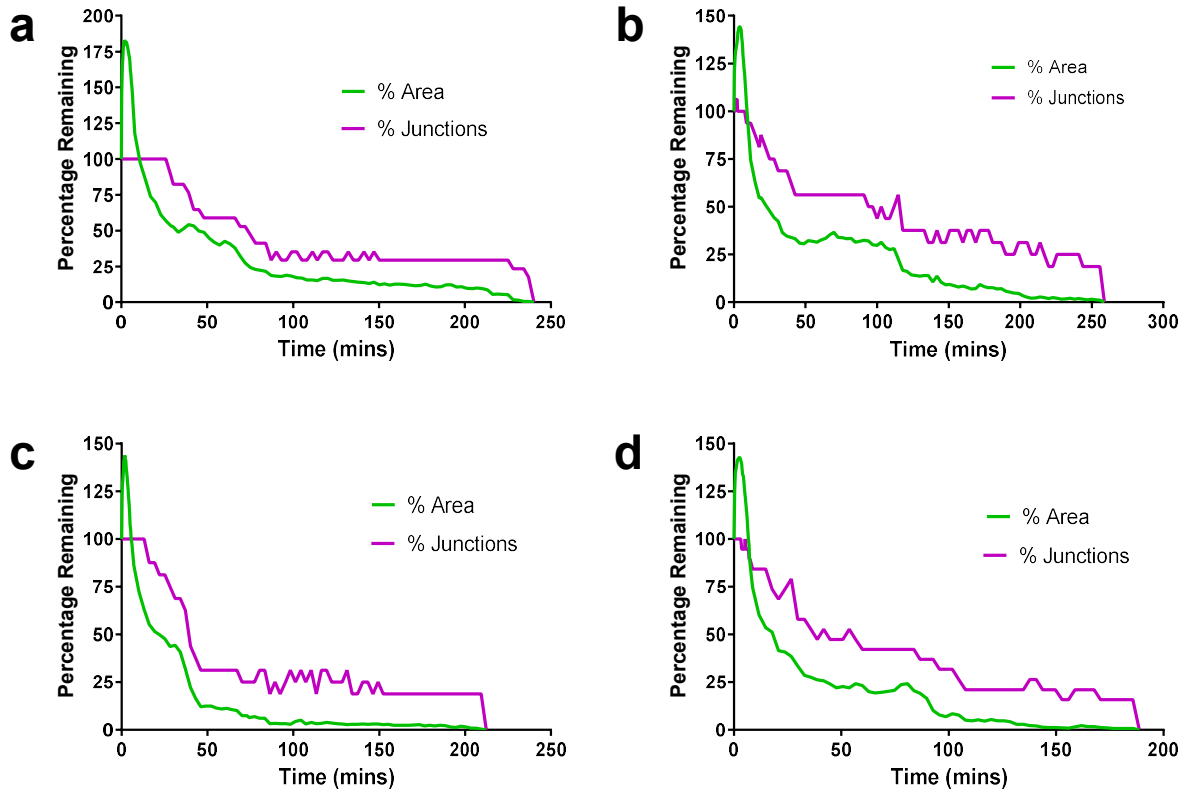

### Supplementary Figure 1. Relationship between wound area changes and intercalation events in WT wing discs

**a-d**, Quantification of the percentage of starting wound edge junctions (magenta) and wound percentage area (green) for four Ecad-GFP wing disc wounds (in addition to the wing disc in Fig. 1e).

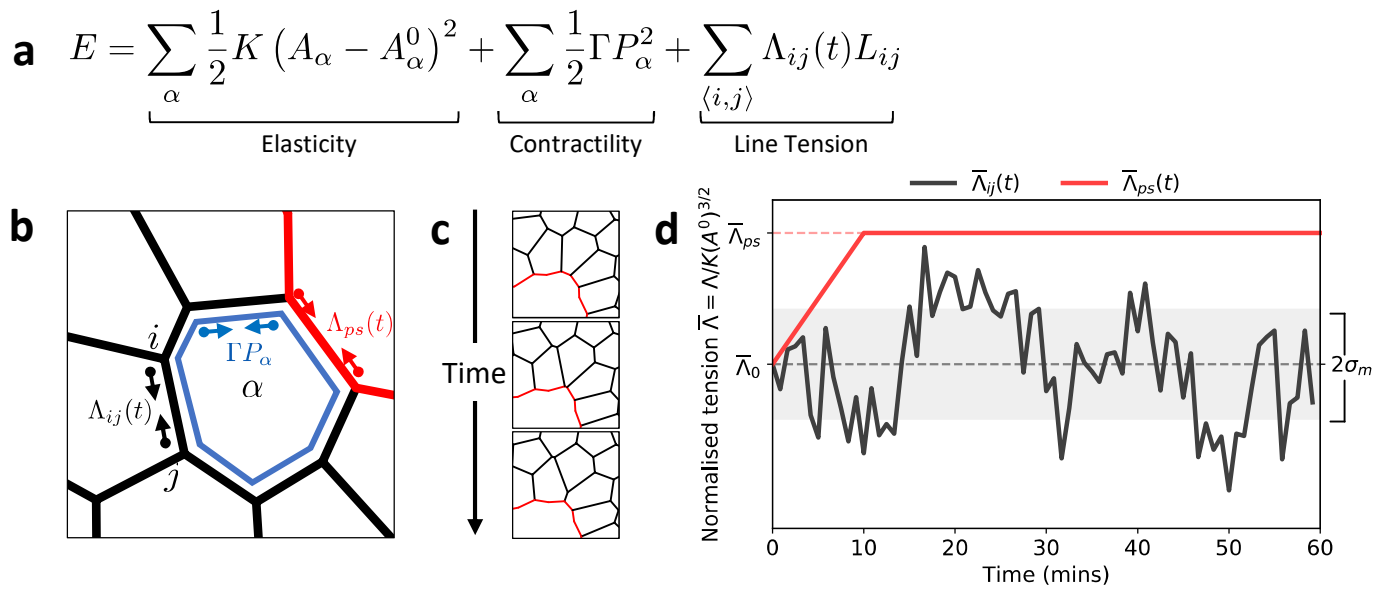

## Supplementary Figure 2. Vertex modelling of wound healing

**a**, Equation for the total energy of the system. **b**, Schematic showing the forces due to line tension and contractility acting on a cell in the vertex model. **c**, Example of a wound edge intercalation. **d**, Cell edge line tension fluctuation (black) and purse-string tension on the wound (red) over time after ablation ( $T = 0$  mins).

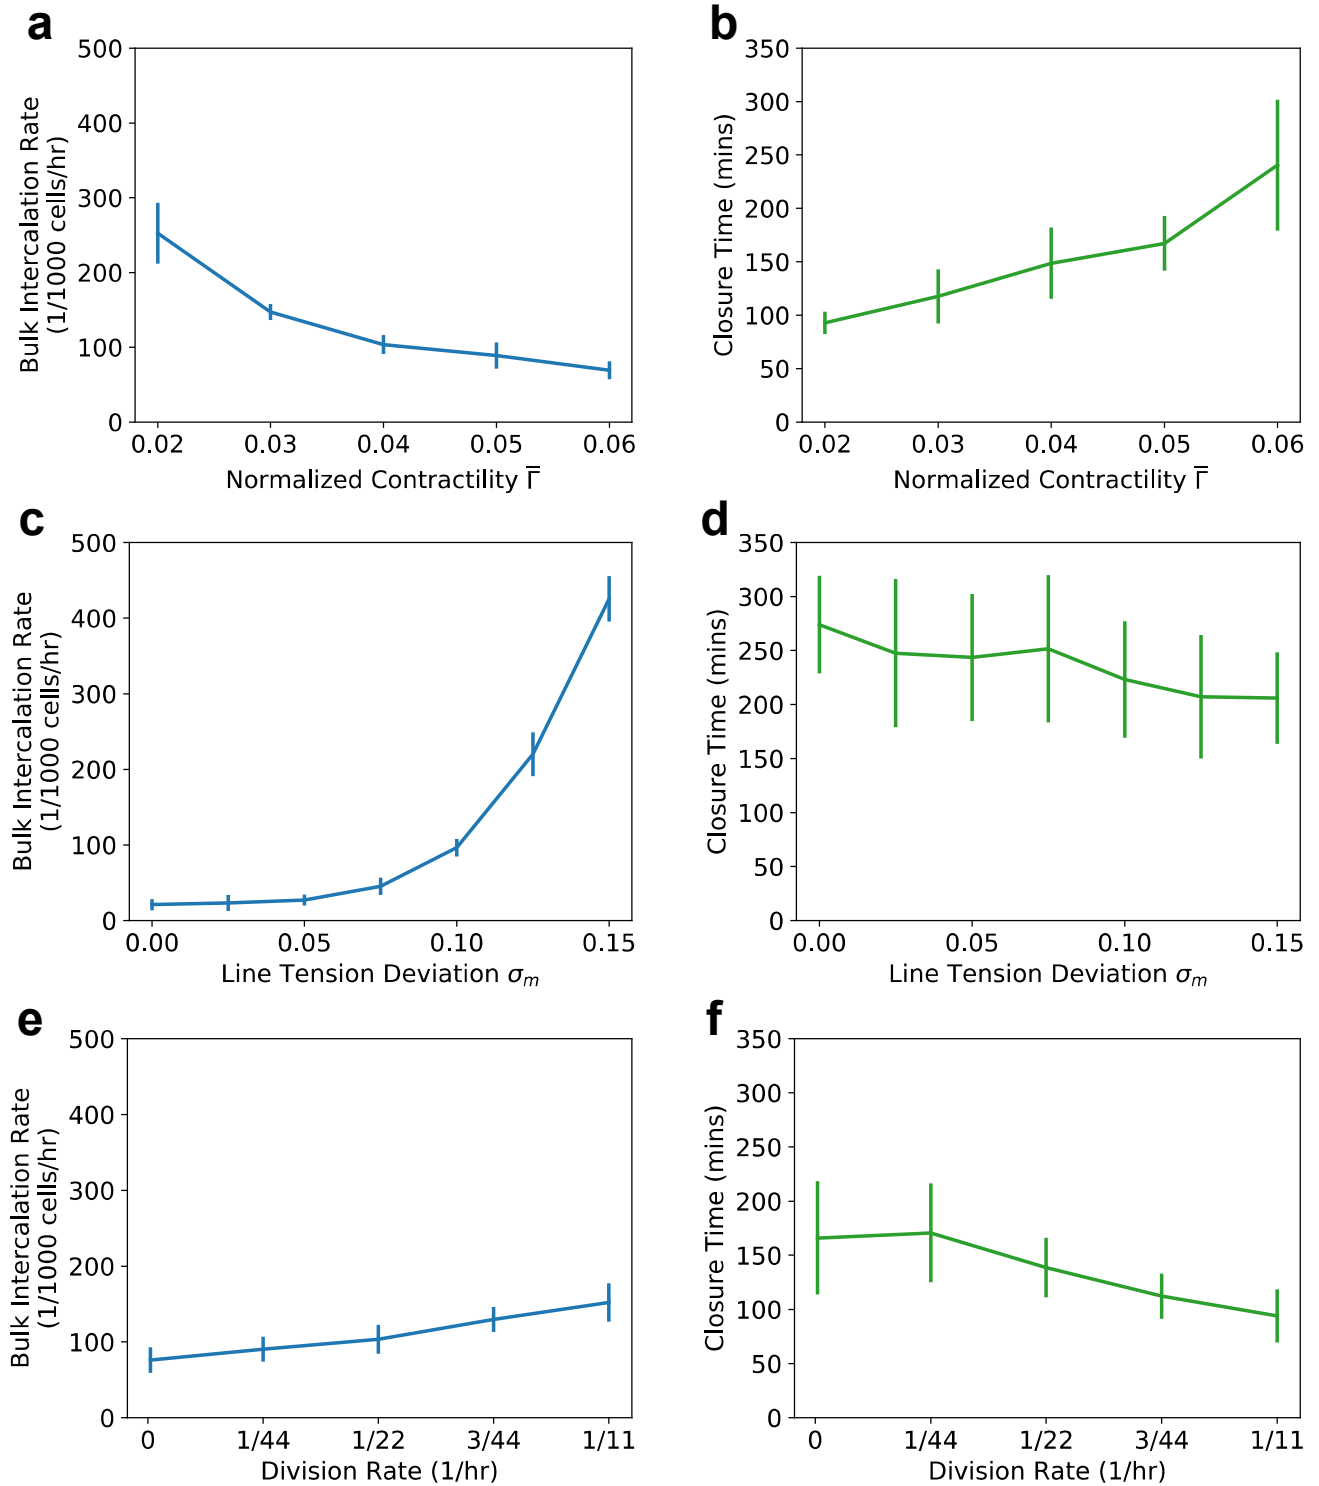

### Supplementary Figure 3. Effect of model parameters on fluidity and closure time

**a**, Mean intercalation rate in a wounded tissue, and **b**, mean closure time against normalized contractility. **c**, Mean intercalation rate in a wounded tissue, and **d**, mean closure time against cell line tension deviation. **e**, Mean intercalation rate in a wounded tissue, and **f**, mean closure time against cell division rate. For each value, ( $n = 12$ ).

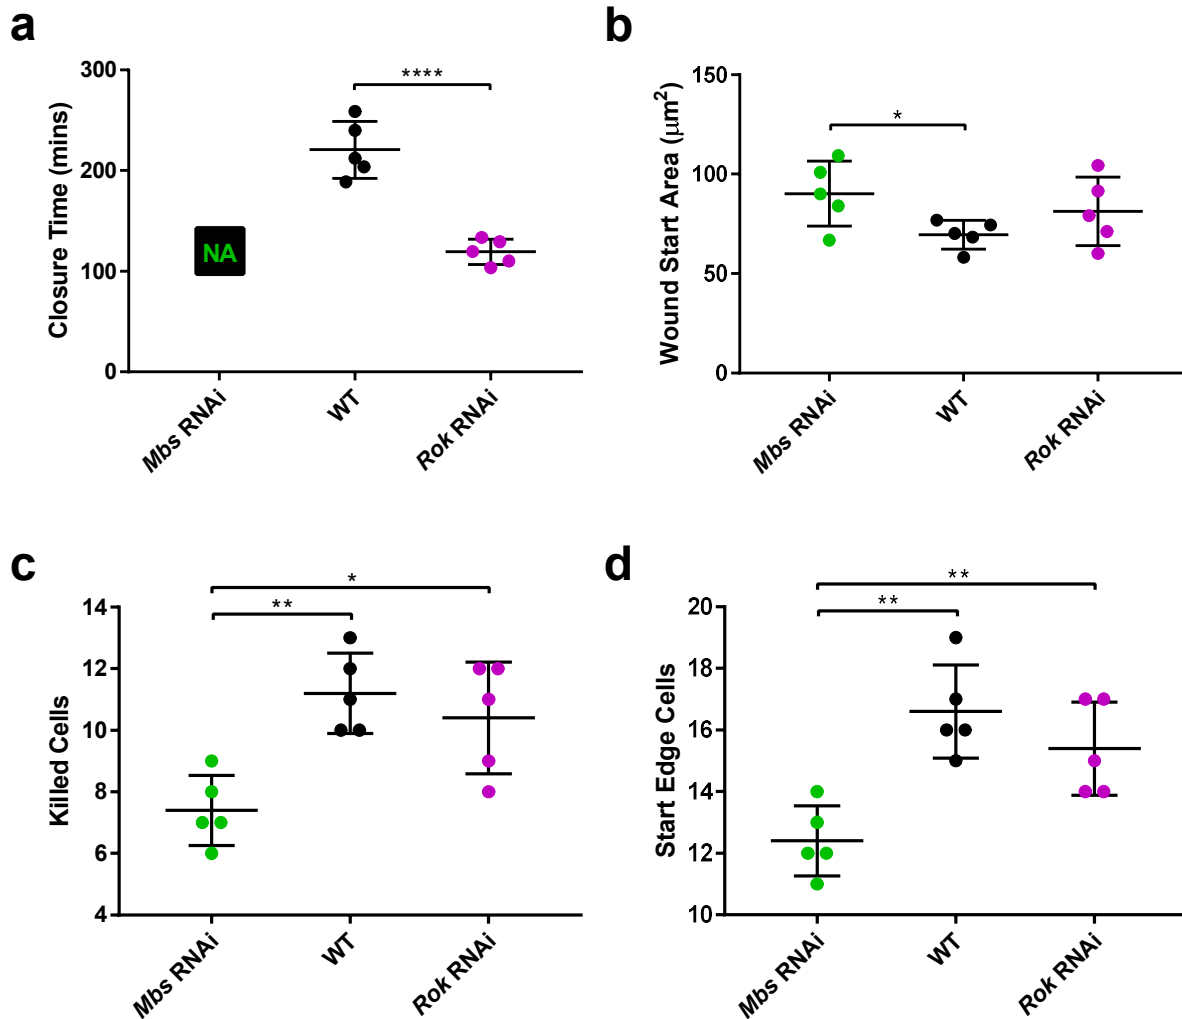

#### Supplementary Figure 4. Comparisons of features of *Mbs* RNAi, *Rok* RNAi and WT wounds

**a**, Quantification of time of closure. *Rok* RNAi wounds close in less time than WT wounds (unpaired *t*-test,  $t=7.318$ ,  $df=8$ ,  $p<0.0001$ ). *Mbs* RNAi wounds fail to close. **b**, Quantification of wound start areas. WT wound were smaller than *Mbs* RNAi wounds (unpaired *t*-test,  $t=2.585$ ,  $df=8$ ,  $p=0.0324$ ). **c**, Quantification of number of cells killed. Fewer cells were killed in *Mbs* RNAi wounds than in WT (unpaired *t*-test,  $t=4.906$ ,  $df=8$ ,  $p=0.0012$ ) and *Rok* RNAi wounds (unpaired *t*-test,  $t=3.128$ ,  $df=8$ ,  $p=0.0141$ ). **d**, Quantification of starting wound edge cells. *Mbs* RNAi wounds had fewer starting edge cells than WT (unpaired *t*-test,  $t=4.95$ ,  $df=8$ ,  $p=0.0011$ ) and *Rok* RNAi wounds (unpaired *t*-test,  $t=3.536$ ,  $df=8$ ,  $p=0.0077$ ). **a-d**, Error bars = SD.

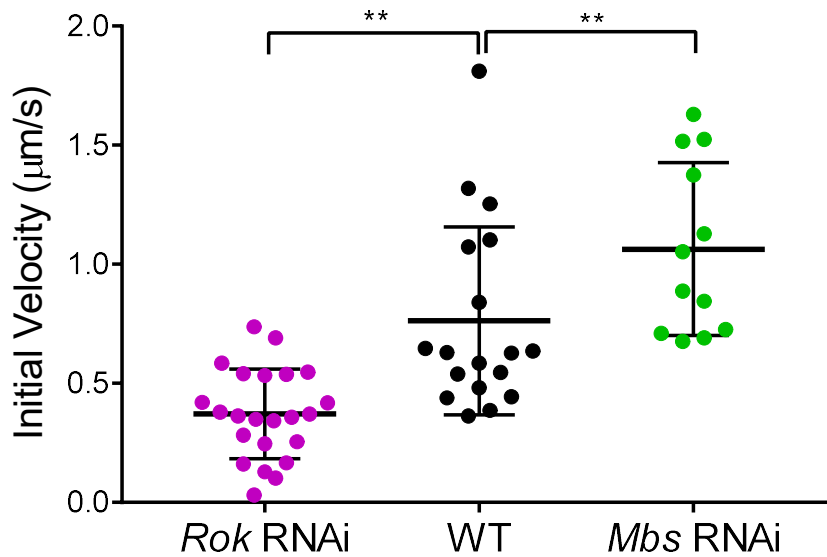

### Supplementary Figure 5. Quantifying junction tension in *Mbs* RNAi, *Rok* RNAi and WT tissues

Quantification of initial vertex recoil rates after single junction ablations in WT (black), *Mbs* RNAi (green) and *Rok* RNAi (magenta) wing discs. Compared to WT, the initial vertex recoil rate was significantly lower in *Rok* RNAi wing discs (Kolmogorov-Smirnov Test,  $D=0.5845$ ,  $p=0.002$ ) and significantly higher in *Mbs* RNAi wing discs (Kolmogorov-Smirnov Test,  $D=0.6667$ ,  $p=0.0033$ ).

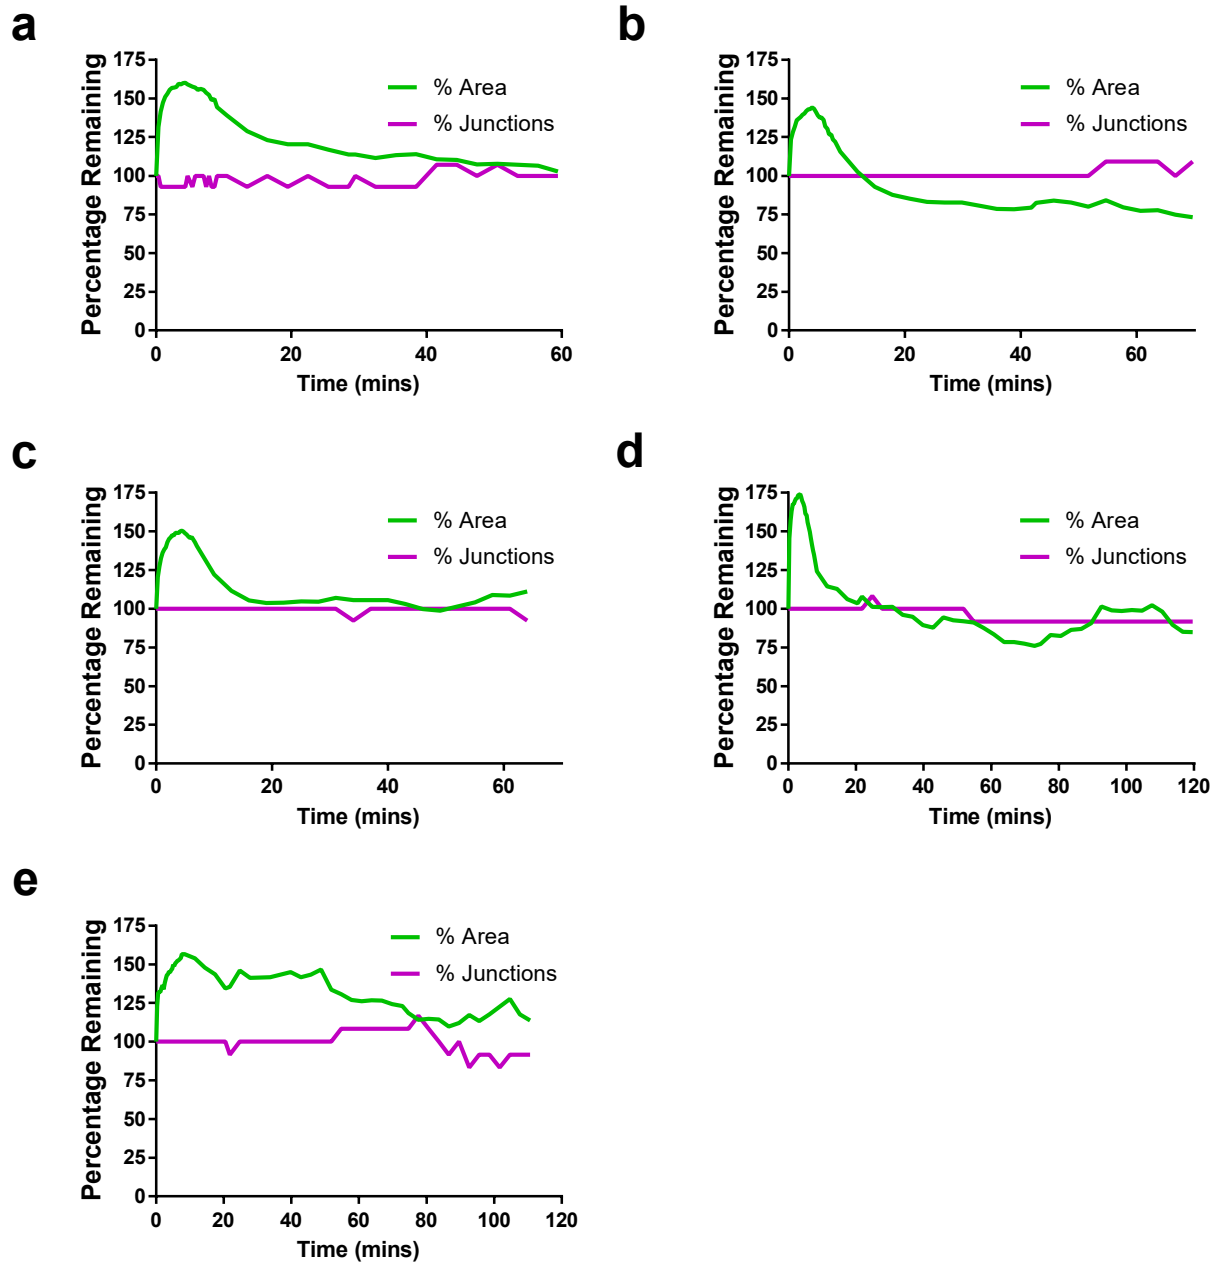

### Supplementary Figure 6. Relationship between wound area changes and intercalation events in *Mbs* RNAi wing discs

**a-e**, Quantification of the percentage of starting wound edge junctions (magenta) and wound percentage area (green) for five *Ecad*-GFP/*UAS-Mbs*-RNAi; *rn*-GAL4/+ wing disc wounds.



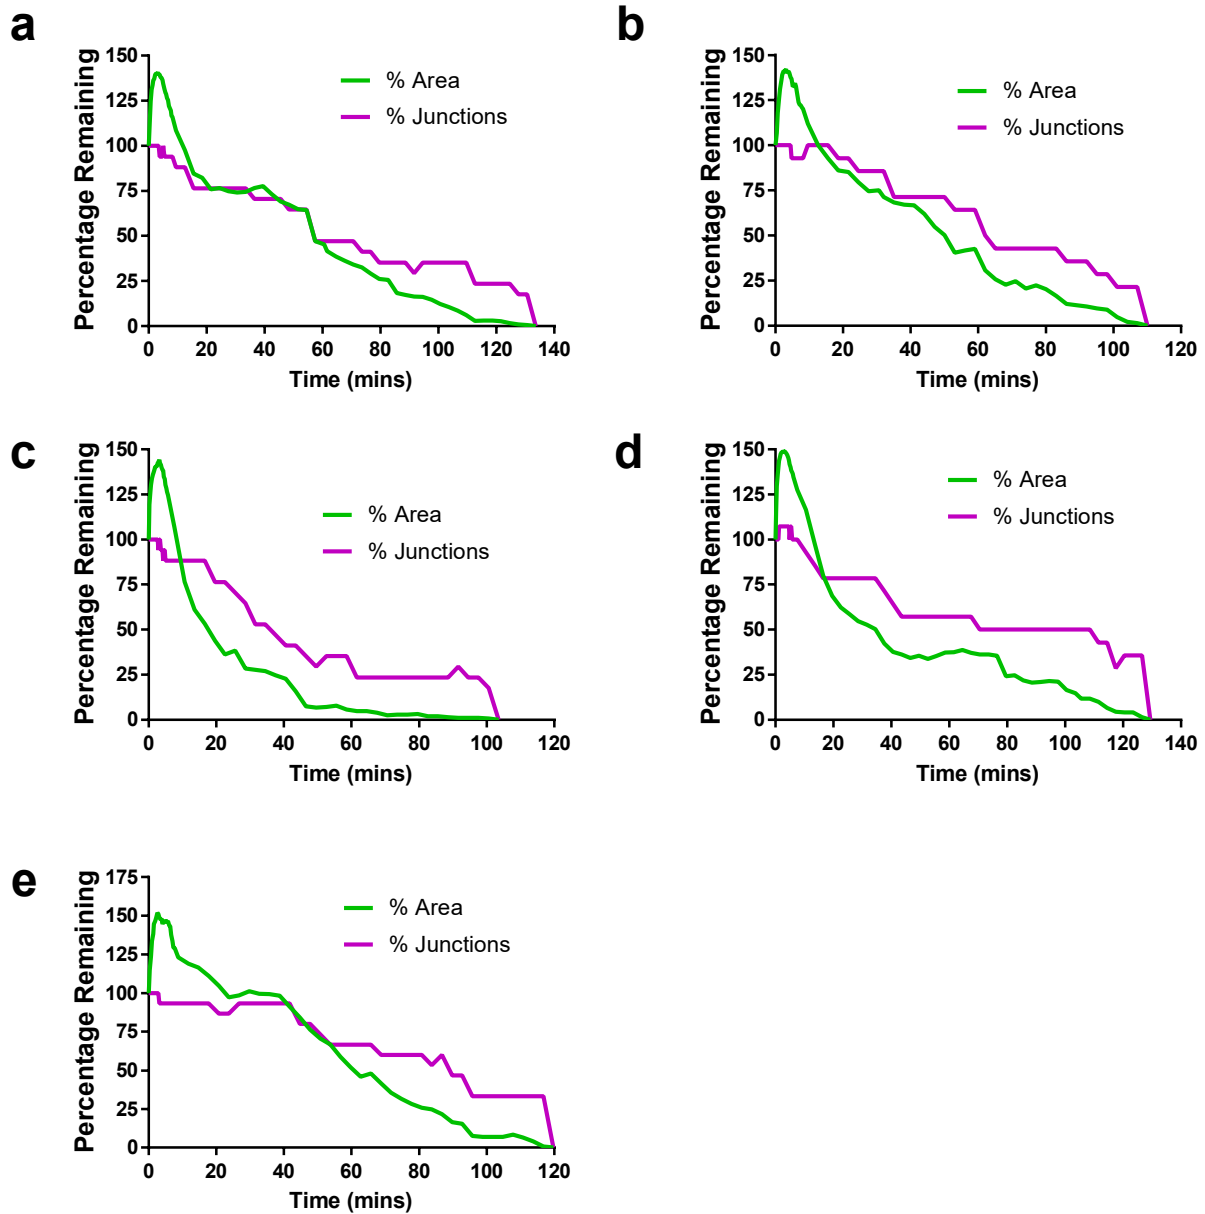

### Supplementary Figure 7. Relationship between wound area changes and intercalation events in *Rok* RNAi wing discs

**a-e**, Quantification of the percentage of starting wound edge junctions (magenta) and wound percentage area (green) for five *Ecad-GFP/UAS-Rok-RNAi; rn-GAL4/+* wing disc wounds.

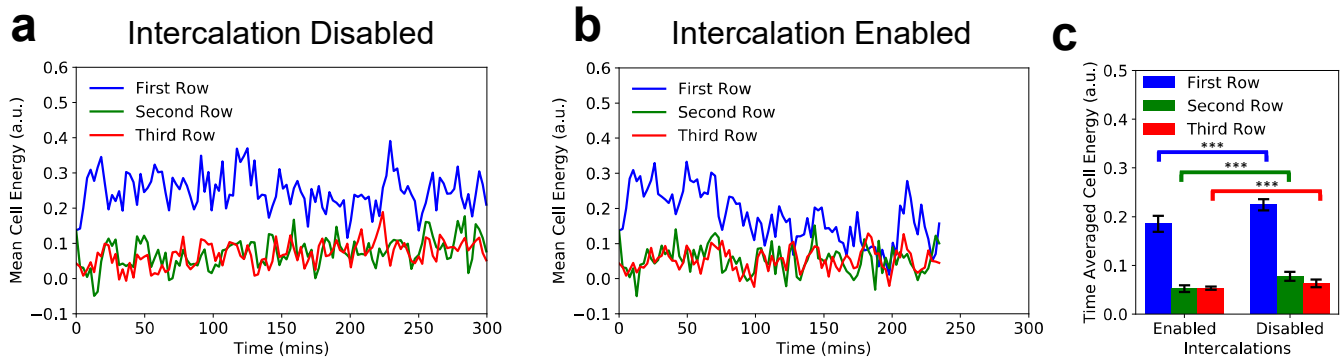

### Supplementary Figure 8. Effect of intercalations on cell energy

**a-b**, Mean cell mechanical energy over time for the first three rows of cells with intercalations **(a)** enabled, and **(b)** disabled. **c**, Quantification of time averaged cell energy for the first three rows, with intercalations enabled and disabled, averaged over 12 simulations. With intercalations enabled, the mean cell area is lower in the first row (unpaired *t*-test,  $t=6.77$ ,  $df=22$ ,  $p<1e-5$ ), second row (unpaired *t*-test,  $t=7.398$ ,  $df=22$ ,  $p<1e-6$ ), and third row (unpaired *t*-test,  $t=3.819$ ,  $df=22$ ,  $p<1e-3$ ). Error bars = SD.

## Supplementary Video Legends

**Supplementary Video 1. Myosin II localisation during *Drosophila* wing disc wound closure.** Time-lapse of the first hour after wounding in a *sqh*<sup>AX3</sup>; *sqh*-GFP, Ecad-tdTomato wing imaginal disc. Myosin II is marked by Sqh-GFP (magenta, maximum intensity projection) and cell outlines by Ecad-tdTomato (green, adaptive projection). Myosin II rapidly accumulates at the wound's edge in the manner of a purse string.

**Supplementary Video 2. WT wound closure.** Time-lapse of an Ecad-GFP/+; *rn-GAL4/+* (WT) wing disc from wounding to wound closure. An adaptive projection of Ecad-GFP (greyscale) is overlaid with skeletonised cell outlines (cyan). The wound itself (white) and initial wound edge cells (blue) are highlighted.

**Supplementary Video 3. Vertex model simulation of wound healing with intercalations disabled.** Red edges represent the wound edge and have increased line tension compared to the surrounding tissue (black edges). The wound fails to close during the simulation.

**Supplementary Video 4. Vertex model simulation of wound healing with intercalations enabled.** The same parameters are used as in Supplementary Video 3, except that intercalations are enabled. The wound is able to close.

**Supplementary Video 5. Analysing the first three rows of cells away from the wound.** Time-lapse of an *Ecad-GFP/+; rn-GAL4/+* (WT) wing disc from wounding to wound closure. An adaptive projection of *Ecad-GFP* (greyscale) is overlaid with skeletonised cell outlines (red). The wound itself is highlighted in white. The first (blue), second (green) and third (red) rows of cells away from the wound are selected prior to wounding. These initial cell identities are propagated through time, regardless of whether the cell intercalates or not.

**Supplementary Video 6. Wound closure in an *Mbs* RNAi wing disc.** Time-lapse of an *Ecad-GFP/UAS-Mbs-RNAi; rn-GAL4/+* wing disc after wounding. The wound fails to close during imaging. An adaptive projection of *Ecad-GFP* (greyscale) is overlaid with skeletonised cell outlines (cyan). The wound itself (white) and initial wound edge cells that do intercalate (blue) and do not intercalate (cyan) are highlighted.

**Supplementary Video 7. Wound closure in a *Rok* RNAi wing disc.** Time-lapse of an *Ecad-GFP/UAS-Rok-RNAi; rn-GAL4/+* wing disc from wounding to wound closure. An adaptive projection of *Ecad-GFP* (greyscale) is overlaid with skeletonised cell outlines (cyan). The wound itself (white) and initial wound edge cells (blue) are highlighted.
